1 Non-parallel morphological divergence following  
2 colonization of a new host plant

3  
4 Kalle J. Nilsson<sup>1\*</sup>, Jesús Ortega<sup>2</sup>, Magne Friberg<sup>1</sup> & Anna Runemark<sup>1</sup>

5  
6 \* Corresponding author

7  
8  
9 Keywords: Parallelism, host plant adaptation, secondary sympatry, adaptation to co-existence

10  
11  
12  
13  
14  
15  
16  
17  
18  
19  
20  
21  
22  
23  
24  
25

1. Department of Biology, Lund University, Sölvegatan 37, 223 62 Lund, Sweden

2. Institute of Evolutionary Biology, Passeig Marítim de la Barceloneta 37-49, 08003

Barcelona, Spain

26 **Abstract**

27 Divergent ecological selection may diversify populations of the same species evolving in  
28 different niches. However, for adaptation to result in speciation, the ecologically divergent  
29 populations have to experience at least some degree of reproductive isolation. While  
30 ecological selection pressures in similar environments are expected to result in convergent  
31 adaptation, sexually selected traits may diverge in different directions in different locations.  
32 Here, we use a host shift in the phytophagous peacock fly *Tephritis conura*, with both host  
33 races represented in two geographically separate areas, East and West of the Baltic Sea, to  
34 investigate convergence in morphological adaptations. We asked i) if there are consistent  
35 morphological adaptations to a host plant shift and ii) if the adaptations to secondary  
36 sympatry with the alternate host race are consistent across contact zones. We found low,  
37 albeit significant, divergence between host races, but only a few traits, including the female  
38 ovipositor, were consistently different. Interestingly, co-existence with the other host race  
39 significantly increased the degree of morphological divergence, but the patterns of divergence  
40 were not consistent across the two sympatric contact zones. Thus, local stochastic fixation or  
41 reinforcement could generate trait divergence, and evidence from additional sources is hence  
42 needed to conclude whether divergence is adaptive.

43

44 **Keywords:** Parallelism, host plant adaptation, secondary sympatry, adaptation to co-existence

## 45 **Introduction**

46 Adaptation to novel niches through ecological selection has been identified as a major driver  
47 of speciation (Schluter, 2008, Schluter, 2009, Nosil, 2012). Classic adaptive radiations  
48 including the Darwin Finches (Weiner, 1994, Loo et al., 2019), the Hawaiian tarweeds and  
49 silverswords (Baldwin et al., 2003) and the recurrent development of limnetic-benthic  
50 stickleback pairs (Schluter, 1993, Bay et al., 2017) are driven by adaptations to novel diets  
51 and habitats. Speciation driven by expansion of novel dietary niches has potential to be rapid,  
52 like in *Rhagoletis* flies, where populations of hawthorn-feeding flies have adapted to use the  
53 introduced apple (*Malus domestica*) as a host during the last 150 years (Bush, 1969, Feder et  
54 al., 1988, Linn et al., 2004, Meyers et al., 2020). Ecological divergence does not necessarily  
55 lead to speciation, however, as divergence and specialization may be reversed in the absence  
56 of reproductive isolation (Taylor et al., 2006, Lackey & Boughman, 2017).

57

58 While there are numerous examples of strong ecological divergence between young species  
59 pairs, the early stages of speciation may be reversible if the drivers of reproductive isolation  
60 are behavioral, plastic or depend on environmental context (Taylor et al., 2006, Lackey &  
61 Boughman, 2017). The coupling of traits involved in ecological adaptation to traits causing  
62 reproductive isolation is crucial for speciation to occur, and is pivotal in models of speciation  
63 (Kirkpatrick & Ravigne, 2002). For this reason, speciation is most readily achieved under  
64 some degree of allopatry (Mayr, 1947, Coyne & Orr, 2004, Rundle & Nosil, 2005) or if  
65 genetic incompatibilities arise, causing postzygotic barriers (Hollinger & Hermisson, 2017).  
66 At early stages of divergence postzygotic isolation is generally weak, and behavioral barriers  
67 to maladaptive mating may be absent in allopatric populations (Nosil, 2012). Prezygotic  
68 barriers, arising more readily during the early stages of diversification (Mendelson, 2003,  
69 Sanchez-Guillen et al., 2014) may be needed for specialization to persist. These may be

70 environment dependent (Funk et al., 2002, Nosil et al., 2002, Lamont et al., 2003). Models  
71 suggest that traits under natural selection may be co-opted as mating cues (Thibert-Plante &  
72 Gavrillets, 2013). However, sexually selected traits that are not co-opted ecological traits are  
73 instead predicted to conform to a mutation order scenario (Mendelson et al., 2014) where  
74 incompatible alleles are fixed in different populations and may drift together with mating  
75 preferences along a line of equilibrium (Uyeda et al., 2009).

76

77 It remains an empirical challenge to resolve whether ecological adaptations and sexually  
78 selected/mate recognition traits diverge to the same extent under parallel selection regimes.  
79 Few studies have explicitly compared parallelism in multiple traits under different selection  
80 regimes. A recent study of Bahamas mosquitofish (*Gambusia hubbsi*) suggests that only a few  
81 traits are highly predictable across parallel predation environments (Langerhans, 2018). In a  
82 series of studies of Skyros wall lizards (*Podarcis gaigeae*) traits under natural selection were  
83 found to evolve in parallel (Runemark et al., 2014, Runemark et al., 2015), whereas traits  
84 under sexual selection diverged stochastically (Runemark et al., 2011). Parallelism in  
85 responses to co-existence with congeners is less well understood, although the evolutionary  
86 divergence of both ecological and sexual traits may be affected also by the local presence or  
87 absence of the other incipient species (Amarasekare, 2003, Calabrese & Pfennig, 2020). If the  
88 reproductive isolation between the incipient species is incomplete, such secondary contact  
89 may break up important ecological adaptations, which may be particularly evident in e.g.  
90 insect host races inhabiting different discrete plant niches. Close congeners inhabiting  
91 different niches may be poorly adapted to the alternative environment (Rundle & Nosil, 2005,  
92 Nilsson et al., 2017, Cronemberger et al., 2020, Martin et al., 2020), which may lead to  
93 reinforcement (Servedio & Noor, 2003) and character displacement with stronger differences  
94 in traits involved in mate choice (Hinojosa et al., 2020). While parallel divergence is expected

95 for ecologically selected traits (Figure 1A), either parallel- or nonparallel character  
96 displacement (Figure 1B-C) or reduced divergence due to introgression (Figure 1D) could be  
97 expected for sexually selected traits that are not strongly coupled with host plant use.

98

99 To understand if ecological selection and selection to reduce maladaptive mating result in  
100 different patterns of divergence, there is a need for joint investigations of how traits mediating  
101 ecological specialization and sexually selected traits develop during adaptation to novel  
102 niches. Such studies should test the hypothesis that the direction of change in sexually  
103 selected traits, during the early stages of speciation, can be more arbitrary than the ecological  
104 traits, which are expected to diverge in parallel across populations of similar niches (Figure  
105 1). In particular, studies asking how co-existence with congeners affects the sexually selected  
106 trait distribution, e.g. through parallel- or non-parallel character displacement (Figure 1),  
107 compared to the distribution of ecologically important traits, may provide insight into the  
108 nature of the selection pressures acting on those different trait types. Here, we address how  
109 ecologically and putatively sexually selected traits evolve and diversify in allopatric and  
110 sympatric areas using two host races of the fly *Tephritis conura*. This species has recently  
111 undergone a host shift resulting in host races specializing on utilizing different *Cirsium* thistle  
112 species as larval food plants (Diegisser et al., 2006a, Diegisser et al., 2006b, Diegisser et al.,  
113 2007, Diegisser et al., 2008). Macroevolutionary analyses reveal that such host plant driven  
114 speciation is one of the main factors explaining the tremendous diversity of phytophagous  
115 insects, because many speciation events can be attributed to host plant shifts (Berlocher &  
116 Feder, 2002, Dres & Mallet, 2002, Nylin et al., 2014), and diversification rates are elevated in  
117 herbivorous insects compared to their non-herbivorous relatives (Mitter et al., 1988, Farrell,  
118 1998, Wiens et al., 2015). For an insect specialist like *T. conura*, the host plant provides a  
119 discrete environment imposing a multidimensional selection pressure. Hence, insect host plant

120 adaptations are predicted to affect multiple traits involved in e.g. phenological matching,  
121 female host preference and larval performance (Matsubayashi et al., 2010). The putatively  
122 strong selection pressures involved in host plant adaptation provides a strong prediction of  
123 parallelism in host-use related traits of phytophagous insects at early stages of the speciation  
124 process (Nosil et al., 2002, Meyers et al., 2020). However, the prediction is less  
125 straightforward for sexually selected traits, because these are not necessarily associated with  
126 host use.

127

128 *Tephritis conura* provides an excellent system for studying patterns of divergence in  
129 ecological and sexually selected traits, as it enables comparisons of trait variation across  
130 replicated sympatric and allopatric settings. The two recently established host races inhabit  
131 two geographically isolated sympatric zones with adjacent allopatric populations, one East  
132 and one West of the Baltic Sea (Figure 2A). *Tephritis conura* females of the two host races  
133 are ovipositing into buds of either *Cirsium heterophyllum* (the ancestral host; Figure 2B) or *C.*  
134 *oleraceum* (the novel host; Figure 2C), and larvae show host specific performance and  
135 survival (Diegisser et al., 2008). During courtship, *Tephritid* flies performs a mating ritual  
136 that includes elaborate wing movements from both sexes (Sivinski, 2000, but see Briceno &  
137 Eberhard, 2017). Hence, *T. conura* offers an opportunity to compare the diversification of  
138 traits that are likely to be under ecological (e.g. body size, ovipositor length) or sexual (wing  
139 size, wing morphology) across different zones of secondary contact. Specifically, we test the  
140 hypotheses (i) that there are morphological effects of a host plant shift in ecologically and  
141 sexually selected characters, (ii) that host race divergence in ecologically selected traits is  
142 parallel in the two geographic areas and (iii) that traits putatively under sexual selection also  
143 diverge in parallel in the two replicas. Given the consistent genetic differentiation between  
144 host races both in allopatry and sympatry (Diegisser et al., 2006a, Ortega et al., [*in prep.*]) we

145 predict the host races to be morphologically divergent, and this divergence to be consistent  
146 across geographical settings. As larval survival is strongly reduced in the alternate host  
147 (Diegisser et al., 2008), we predict hybridization to be maladaptive, potentially resulting in  
148 reinforcement and character displacement between the host specialists in sympatry.

149

## 150 **Methods**

### 151 **Sampling**

152 The dipteran *T. conura* infest several species of the thistle genus *Cirsium* (Asteraceae)  
153 (Romstock-Volkl, 1997). Adult *T. conura* oviposit into thistle buds during early summer,  
154 wherein the adolescent flies remain during larval development and pupation. *Tephritis conura*  
155 infesting *Cirsium heterophyllum*, the melancholy thistle, have recently colonized and adapted  
156 to *C. oleraceum*, the cabbage thistle. Haplotype analyses suggest that a peripatric host shift  
157 took place during the last ice age in the Alps (Diegisser et al., 2006b). The two host races are  
158 largely reproductively isolated, but there is evidence of some small amounts of gene flow  
159 (Diegisser et al., 2006b). The flies infesting *C. oleraceum* have adapted ecologically to the  
160 smaller bud sizes (Diegisser et al., 2007), and have a significantly shorter ovipositor to body  
161 size ratio. Another variable character is wing pigmentation. Wing patterns in Tephritid flies  
162 have been suggested to be under sexual selection, as males perform dances with their wings to  
163 attract females (Sivinski & Pereira, 2005). Tephritid males attempting to initiate copulation  
164 situate themselves in front of female flies and posture with their wings (Sivinski, 2000, but  
165 see Briceno & Eberhard, 2017). We therefore have reason to assume that ecological selection  
166 pressures are more important for size traits in general, and for ovipositor length in particular,  
167 while wing traits are more likely shaped by sexual selection. For simplicity, we refer to flies  
168 infecting *C. heterophyllum* as CH-flies, while the flies infecting *C. oleraceum* will be denoted  
169 CO-flies.

170

171 We used a parallel sampling design to examine phenotypic adaptation to a novel host plant  
172 and effects of co-existence between host races, by sampling each host race both in sympatry  
173 and allopatry on each side of the Baltic (Figure 2A). We collected thistle buds infested by *T.*  
174 *conura* larvae/pupae and allowed the adults to eclose in a common environment. CO-fly  
175 larvae were sampled in Germany and Lithuania (allopatric areas), both host races were  
176 collected in the sympatric areas in southern Sweden and Estonia, and allopatric CH-fly larvae  
177 were sampled in mid-Sweden and Finland (Figure 2A, Table S1). All sampling took place  
178 during June and July 2018. The sampling scheme enables examining to what extent patterns  
179 of phenotypic divergence are explained by host plant adaptations, by co-existence with the  
180 other host race, and if these patterns differ between the two transects. Typically, *C.*  
181 *heterophyllum* and *C. oleraceum* do not grow in the same microhabitat. Thus, the sympatric  
182 and allopatric definitions here refer to the presence of one or both thistle species in the general  
183 area (Figure 2A).

184

### 185 **Morphological measurements**

186 *Tephritis conura* adults eclosed from field-collected thistle buds in a common lab  
187 environment, (see Supplementary material S1). One male and one female per bud were  
188 euthanized by freezing a few days after emergence and subsequently included in the  
189 morphological analysis. For each individual, we took magnified photographs using a  
190 Celestron 44308 USB microscope. We photographed a lateral image of the fly body after  
191 removal of the wings and a dorsal image of the right wing on a transparent background to  
192 allow better visibility of the wing veins. Body length and ovipositor length were measured  
193 digitally from lateral photographs (Figure S1). We placed 14 landmarks, adapted from  
194 Pieterse et al. (2017), digitally on the dorsal wings (Figures 2D and S2) for geometric



195 morphometrics (Zelditch, 2004). We added a landmark; number 15, to reflect the high  
196 variance in the proximal area on the wing. Digitization was performed in TPSDig2  
197 v2.31(Rohlf, 2017) and we used TPSUtil v1.76 (Rohlf, 2018) for file handling.

198

### 199 **Statistical analysis**

200 We used PAST3 v3.20 (Hammer et al., 2001) to apply a Procrustes fit to the landmark data to  
201 align and scale the wings (Figure 2D). To produce relative warps (i.e. principal components  
202 of shape) to compare shape between groups, a principal component analysis (PCA) was  
203 performed with the Procrustes fitted data using PAST3 v3.20 (Hammer et al., 2001) (Figure  
204 S3). Based on the variance explained by the eigenvalues (Figure S4) and the broken stick  
205 criterion (Jackson, 1993), six principal components which jointly explain 67.6% of the  
206 variance were used in further analyses of wing shape. All subsequent statistical analysis were  
207 performed in R (R Core Team, 2019).

208

209 To investigate whether host race was the major factor explaining variation in fly morphology,  
210 we performed a PCA on the variables fly body length (mm), wing length (mm), wing width  
211 (mm), wing melanisation ratio (%) and relative warps 1-6 reflecting wing shape. We  
212 quantified five morphological traits and wing shape for 583 flies. We found six significant  
213 dimensions of wing shape variation between flies (Figure S5), that were included in  
214 subsequent analyses of phenotypic divergence. We identified four significant dimensions of  
215 variation from a PCA-analysis using the broken stick criterion (Jackson, 1993) (Figure S6).  
216 Collectively, these PCA-axes explained 78.0% of the morphological variance in the dataset.

217

218 To formally test if the two host races were significantly differentiated, we applied a  
219 multivariate analysis of variance (MANOVA), with all of these variables included as response

220 variables (body length, ovipositor length, wing width, wing length, wing melanisation and  
221 PC1-6 of wing shapes). To investigate both whether host races differed, and if co-existence  
222 with the other host race affected morphology, we ran a generalized linear model (GLM)  
223 including host origin, co-existence, and their interaction as explanatory factors. To further test  
224 if the patterns of morphological adaptation were parallel in the Eastern and the Western  
225 transects, and explicitly address if co-existence affected host plant races in the same way in  
226 these replicates, we performed a final MANOVA with host race, co-existence and  
227 geographical setting and their 3-way and 2-way interactions as factors. The MANOVAs were  
228 performed separately on females and males as this enabled including the biologically  
229 important ovipositor (Diegisser et al., 2007) in analyses of females. This also reduced the  
230 multicollinearity of explanatory factors to below recommended values (Hair, 2010). To find  
231 which combination of factors that best explained the data, we estimated and compared AIC-  
232 scores (Akaike, 1974) for all models.

233

234 To further investigate parallel and non-parallel differentiation of the host race pairs, we  
235 applied separate linear discriminant function analyses (LDAs) on the data from the Eastern  
236 and Western transects. We used host races and co-existence with the other host race as factors  
237 in the models. This analysis was performed on males and females separately. To test if the  
238 patterns of divergence differed significantly between the transects, we performed each LDA  
239 10,000 times using the bootstrap R package 'boot' (Canty & Ripley, 2020) and used the  
240 confidence intervals to assess if the loadings differed between analyses. In addition, we  
241 assessed the proportion of divergence is shared among host races and unique among the  
242 populations in a nested MANOVA using size and shape variables against host race and  
243 transect following Langerhans & DeWitt (2004). We applied this test to sympatric

244 populations separately from allopatric populations, to avoid confounding effects of co-  
245 existence.

246

## 247 **Results**

248 We found weak evidence for separation between host races along the two first major axes of  
249 divergence (Figure 2E), with CO-flies, on average had lower values of PC1 compared to CH-  
250 flies, reflecting predominantly size variables (GLM:  $F_1 = 5.189$ ,  $p = 0.023$ ; Figure 2E). This  
251 host race difference was small compared with the variation among populations.

252

253 We found multivariate divergence between host races (Pillai's trace = 0.237,  $F_{11, 271} = 7.66$ ,  
254  $p < 0.001$ ), as well as an effect of co-existence with the other host race (Pillai's trace = 0.257,  
255  $F_{11, 271} = 8.51$ ,  $p < 0.001$ ), and a significant interaction between host race and co-existence  
256 (Table 1; Pillai's trace = 0.155,  $F_{11, 271} = 4.52$ ,  $p < 0.001$ ) in females. For males, co-existence  
257 (Pillai's trace = 0.165,  $F_{10, 275} = 5.45$ ,  $p < 0.001$ ) and the interaction between host race and co-  
258 existence (Pillai's trace = 0.141,  $F_{10, 275} = 4.5$ ,  $p < 0.001$ ) affected morphology, while host race  
259 alone did not significantly affect morphology (Table 1). The differences between males and  
260 females could potentially be explained by the strong divergence in ovipositor length, included  
261 only in the analyses of females.

262

263 Females of the two host plant races differed in ovipositor length and in loadings of relative  
264 warp 5, reflecting wing shape (Tukeys post hoc tests; Table 2). Co-existence influenced a  
265 suite of characters, including ovipositor length, wing length, wing width, melanisation ratio,  
266 and wing shape. Moreover, body length, wing width, and several wing shape components  
267 were significantly affected by the interaction between host race and co-existence (Table 2;  
268 figures 3 and S7). Ovipositor length diverged as expected under ecological selection,

269 especially in the Eastern transect (Figure 1A). In contrast, wing length showed tendencies to  
270 diverge as expected by character displacement in the Eastern transect (Figure 1B; Figure 3C).  
271 Male host races differed in fewer variables than females, with only relative warp 5 differing  
272 significantly between the host races (Table 2, figures S8-S11). Co-existence reduced male  
273 wing length with both host races having shorter wings in sympatric regions. Male wing width,  
274 melanisation ratio and wing shape also differed between populations that co-exist with the  
275 other host race and those that do not.

276

277 Host race and co-existence affected female morphology differently East and West of the  
278 Baltic Sea, as illustrated by a significant 3-way interaction (Pillai's trace = 0.117,  $F_{11,277} =$   
279 3.22,  $p < 0.001$ ; Table S2). All 2-way interactions and main effects were also significant in the  
280 full model (Table 1). This pattern holds true also for males (Pillai's trace = 0.092,  $F_{10,271} =$   
281 2.74,  $p = 0.0031$ ; Table S3 and S4). Hence, depending on geography, host race and co-  
282 existence affects fly morphology differently.

283

284 To assess how much of the female divergence that was unique to a transect, shared between  
285 the host races and differentially affected by host race in the two transects, we estimated  
286 Wilk's partial  $\eta^2$ . We find that while a high share of the partial variance was explained by  
287 shared divergence between host races ( $F_{11,273} = 4.96$ , 30.6%) and transect specific patterns of  
288 host race divergence ( $F_{11,273} = 3.81$ , 25.3%), divergence between transects explained the  
289 highest percentage of partial variance ( $F_{11,273} = 6.85$ , 37.8% (Table S5).

290

291 As host race affected morphology differently depending on geography, we further tested if the  
292 major axis of divergence separated host races in both transects, and if the same traits  
293 separated groups using a Linear Discriminant Analysis (LDA). We find that the importance of

294 host race differed between transects. In the Western LDA, host races separated along the first  
295 discriminant axis whereas the sympatric and allopatric populations separated along the second  
296 discriminant axis (Figure 4). In the Eastern LDA, the first discriminant instead divided the  
297 two CO populations and the second discriminant axis divided the two CH populations (Figure  
298 4). Moreover, different sets of characters separated populations in the two transects as  
299 bootstrap loadings show that different characters loaded on the first discriminant axes in the  
300 LDAs (Fig. 4C; Table S6).

301

## 302 **Discussion**

303 Contrary to previous studies that found clear differences between the host races (Diegisser et  
304 al., 2007) we found low and variable morphological differentiation between host races of *T.*  
305 *conura*. Multivariate differentiation between host races was driven by subtle differences  
306 across many traits. Host race separation reflected mainly ovipositor length differences with  
307 CH-fly ovipositors being longer than CO-fly ovipositors, although this varied among  
308 populations. Previous work report consistent divergence for two loci (Diegisser et al., 2006b),  
309 and whole genome data (Ortega et al., [in prep.]) support the presence of discrete genetic host  
310 races. Moreover, the flies also have poor performance on the alternate host plant (Diegisser et  
311 al., 2008). In light of this, the moderate host race divergence in morphology was unexpected,  
312 but this result is in line with the observation that parallelism in fitness is typically higher than  
313 for both phenotypic divergence and genetic divergence (Bolnick et al., 2018). Moreover,  
314 parallel divergence only in traits under strong ecological selection is consistent with the  
315 findings in response to different predation regimes in Bahamas Mosquitofish (Langerhans,  
316 2018), where only a few traits show highly predictable patterns of diversification. Hence, at  
317 early stages of diversification driven by ecological adaptation, parallelism may be high only  
318 for traits that are strongly coupled to the ecological factor the species is adapting to.

319

320 Two out of five female traits match a parallel divergence scenario, ovipositor length, and  
321 body length in the Western transect. Hence, the degree of parallelism among host races in  
322 morphological divergence was lower than expected. Intermediate ovipositor lengths in  
323 Western CH-flies could suggest selection for shorter ovipositors in sympatry, potentially due  
324 to introgression or to be able to utilize also *C. oleraceum* buds to a higher degree. Many of the  
325 traits measured are highly correlated with body size, a factor that typically varies with  
326 temperature in insects (Atkinson, 1994, but see Shelomi, 2012). While the parallel sampling  
327 design with allopatric regions both South and North of both sympatric zones would partly  
328 correct for such temperature effects, temperature could still differ between the Eastern and  
329 Western transects, potentially contributing to non-parallel patterns of divergence.

330

331 When we jointly investigated effects of co-existence, geographic origin and their interactions  
332 on host race divergence, we found that both co-existence with the other host race and transect  
333 affected morphology. Hence, the low host race divergence may be explained by interacting  
334 effects of co-existence with the other host race, with non-parallel patterns of divergence in the  
335 two transects. This pattern would be consistent a mutation order scenario (Figure 1C). If  
336 reinforcement due to maladaptive hybridization would have been a prominent force in  
337 sympatric populations, we would expect traits to be more divergent between the host races in  
338 sympatry compared to allopatry, i.e. for character displacement to arise (Comeault et al.,  
339 2016, Calabrese & Pfennig, 2020, Kyogoku & Wheatcroft, 2020; Figure 1B-C). This was  
340 generally not the case. While the degree of host race divergence differed between sympatry  
341 and allopatry, the most common pattern was that the traits in sympatric populations are more  
342 similar between host races than traits in allopatry, most prominent in wing morphology traits.  
343 This could be indicative by introgression (Figure 1D), consistent with findings by Ortega et

344 al. [*in prep.*], or effects of a shared environment. Co-existence most strongly affects on wing  
345 size, with wing width being shorter in sympatry than in allopatry in the Western transect. This  
346 could be consistent with selection for shorter dispersal distances (Claramunt et al., 2012),  
347 potentially to avoid dispersal to the other host plant, reducing survival. We also found patterns  
348 consistent with character displacement in in wing length in the Eastern transect. Hence,  
349 contrary to reports of parallelism also in sexually selected traits in ecotypes in e.g.  
350 sticklebacks (Boughman et al., 2005), we find mixed evidence for parallelism in wing traits  
351 that putatively are under sexual selection. This could reflect a mutation order scenario, where  
352 the difference may be important but the specific trait or direction of the difference is arbitrary  
353 (Mendelson et al., 2014). Some degree of sexual selection may further differentiate  
354 populations under a mutation order scenario (Rundle & Rowe, 2018), underlining the need to  
355 further investigate if there is sexual selection at work in this system and identifying the traits  
356 under selection.

357

358 The degree of divergence differ between transects. While host races are separated by the main  
359 discriminant axis in the Western transect, host race was a less important predictor of  
360 divergence in the Eastern transect. The traits that differ between host races also differs  
361 between our two geographic replicates. A mutation order scenario (Mendelson et al., 2014)  
362 could explain the seemingly arbitrary divergence between the transects (Figure 1C). However,  
363 the differences in patterns between the transects East and West of the Baltic Sea could have  
364 several additional explanations related to demographic history, population size and the extent  
365 to which the host plant races co-exist locally. Possibly, one contact zone may be older than  
366 the other and populations in older sympatry would have had more time for character  
367 displacement to develop. Alternatively, if the Eastern transect has a higher proportion suitable  
368 thistle habitat, this could have increased both within- and between host race connectivity and

369 potentially gene flow (Servedio & Noor, 2003). Genetic data and detailed analyses of  
370 introgression should be used to resolve whether selection against hybridization in allopatric  
371 regions could be expected.

372

373 Morphological differentiation does not always strongly reflect even crucial ecological  
374 adaptations. For instance, cultural evolution contributes to reproductive isolation in Cassia  
375 crossbills (*Loxia sinesciuris*) (Porter & Benkman, 2019) and *Rhagoletis pomonella* have  
376 adapted their phenologies to host fruits ripening at different times of the year (Filchak et al.,  
377 2000). A potential explanation to the low consistency of host race divergence may lie with the  
378 traits included in this analysis. Females were more diverged than males. The strong  
379 divergence in females likely reflects the inclusion of ovipositor length in the analyses, as  
380 ovipositor length was one of the traits that differed significantly between the host races,  
381 consistent with previous findings (Diegisser et al., 2007). These findings are similar to those  
382 of Jourdan et al. (2016) where divergence in female mosquitofishes (*Gambusia*) divergence  
383 was more parallel than male divergence. Potentially, the other traits measured are not  
384 important enough for host plant adaptation to result in strongly parallel divergence. Traits that  
385 have been shown to differ strongly between host races include female ovipositor length  
386 (Diegisser et al., 2007) and the larval ability to survive on the different host plant species  
387 (Diegisser et al., 2008), and these traits are more likely to show parallel divergence.

388 Moreover, host plant preference may have a potential to act as a magic trait (Gavrilets, 2004,  
389 Thibert-Plante & Gavrilets, 2013) for *T. comura*, separating the habitats of the populations and  
390 simultaneously providing reproductive isolation as these flies mate on their host plant  
391 (Diegisser et al., 2007). Finally, we cannot rule out that other, unmeasured traits are important  
392 for sexual selection, as pheromones have been suggested previously to play a role in tephritid  
393 mate choice (Roriz et al., 2019), as well as overexpression of antioxidants, which have been



394 shown to increase male performance under certain conditions (Teets et al., 2019). Regardless  
395 of the exact selection pressures acting on our set of study traits, our findings are important,  
396 because they show a context dependence for host race adaptation, with parallelism only in  
397 ecologically strongly selected traits, whereas there are non-parallel changes, some consistent  
398 with character displacement for other traits. These insights should guide the design and  
399 interpretation when studying ecologically driven divergence.

400

401 In conclusion, our work suggests that morphological responses to niche shifts can be highly  
402 context dependent. Co-existence with closely related congeners and demographic origin may  
403 affect easily measured morphological characters, potentially masking underlying parallelism  
404 in traits important for adaptation to specific niches. Moreover, we find intriguing patterns of  
405 non-parallel divergence in putatively sexually selected traits and even character displacement  
406 in opposite directions in the two geographic replicas, suggesting that mutation order  
407 dependent divergence may lead to different solutions to avoid introgression in independent  
408 contact zones.

409

#### 410 **Acknowledgements**

411 We thank Mikkel Brydegaard for help with automatizing wing color analysis, Jodie Lilley,  
412 Emma Kärrnäs and Mathilde Schnuriger for help during field- and lab work, and the members  
413 of the Lund University research group on the Evolutionary Ecology of Plant-Insect  
414 Interactions for valuable discussions on earlier drafts of this manuscript. This study was  
415 financed by a Wenner-Gren Fellowship and a grant from the Swedish Research Council to  
416 AR.

417

#### 418 **Author contribution**

419 A.R conceived and designed the study. KJ.N., J.O. and A.R. performed the field work. KJ.N.  
420 reared the flies, quantified the morphological traits, performed the statistical analyses, with  
421 advice from A.R. and wrote a draft of the manuscript. A.R. and M.F. helped writing the  
422 manuscript and all co-authors commented on and approved the final version of the  
423 manuscript.

424

#### 425 **Conflict of interest statement**

426 The authors have no conflict of interest to declare.

427

#### 428 **Data availability statement**

429 All data sets will be uploaded to the Dryad Digital Repository ([www.datadryad.org](http://www.datadryad.org)) upon  
430 acceptance.

431

#### 432 **References**

433

434 Akaike, H. 1974. New look at statistical-model identification. *Ieee Transactions on Automatic*  
435 *Control* **AC19**: 716-723.

436 Amarasekare, P. 2003. Competitive coexistence in spatially structured environments: a  
437 synthesis. *Ecology Letters* **6**: 1109-1122.

438 Atkinson, D. (1994) Temperature and organism size - A biological law for ectotherms.  
439 *Advances in Ecological Research* **25**: 1-58

440 Baldwin, B. G., Carlquist, S. & Carr, G. D. 2003. *Tarweeds & Silverswords : evolution of the*  
441 *Madiinae (Asteraceae)*. Missouri Botanical Garden Press, St. Louis, Missouri.

442 Bay, R. A., Arnegard, M. E., Conte, G. L., Best, J., Bedford, N. L., McCann, S. R., . . .

443 Peichel, C. L. 2017. Genetic Coupling of Female Mate Choice with Polygenic

- 444 Ecological Divergence Facilitates Stickleback Speciation. *Current Biology* **27**: 3344-  
445 3349.
- 446 Berlocher, S. H. & Feder, J. L. 2002. Sympatric speciation in phytophagous insects: Moving  
447 beyond controversy? *Annual Review of Entomology* **47**: 773-815.
- 448 Bolnick, D. I., Barrett, R. D. H., Oke, K. B., Rennison, D. J. & Stuart, Y. E. (2018)  
449 (Non)Parallel Evolution. *Annual Review of Ecology, Evolution, and Systematics* **49**:  
450 303-330
- 451 Boughman, J. W., Rundle, H. D. & Schluter, D. 2005. Parallel evolution of sexual isolation in  
452 sticklebacks. *Evolution* **59**: 361-373.
- 453 Briceno, R. D. & Eberhard, W. G. 2017. Copulatory Dialogues Between Male and Female  
454 Tsetse Flies (Diptera: Muscidae: *Glossina pallidipes*). *Journal of Insect Behavior* **30**:  
455 394-408.
- 456 Bush, G. L. 1969. Sympatric host race formation and speciation in frugivorous flies of genus  
457 *Rhagoletis* (Diptera, Tephritidae). *Evolution* **23**: 237-251.
- 458 Calabrese, G. M. & Pfennig, K. S. 2020. Reinforcement and the Proliferation of Species.  
459 *Journal of Heredity* **111**: 138-146.
- 460 Canty, A. & Ripley, B. D. (2020) boot: Bootstrap R (S-Plus) Functions. R package version  
461 1.3-25.
- 462 Claramunt, S., Derryberry, E. P., Remsen, J. V., Jr. & Brumfield, R. T. 2012. High dispersal  
463 ability inhibits speciation in a continental radiation of passerine birds. *Proceedings of*  
464 *the Royal Society B-Biological Sciences* **279**: 1567-1574.
- 465 Comeault, A. A., Venkat, A. & Matute, D. R. 2016. Correlated evolution of male and female  
466 reproductive traits drive a cascading effect of reinforcement in *Drosophila yakuba*.  
467 *Proceedings of the Royal Society B-Biological Sciences* **283**.
- 468 Coyne, J. A. & Orr, H. A. 2004. *Speciation*. Sinauer Associates, Sunderland, Mass.

- 469 Cronemberger, A. A., Aleixo, A., Mikkelsen, E. K. & Weir, J. T. 2020. Postzygotic isolation  
470 drives genomic speciation between highly cryptic *Hypocnemis* antbirds from  
471 Amazonia. *Evolution* **74**: 2512-2525.
- 472 Diegisser, T., Johannesen, J. & Seitz, A. 2006a. The role of geographic setting on the  
473 diversification process among *Tephritis conura* (Tephritidae) host races. *Heredity* **96**:  
474 410-418.
- 475 Diegisser, T., Johannesen, J. & Seitz, A. 2008. Performance of host-races of the fruit fly,  
476 *Tephritis conura* on a derived host plant, the cabbage thistle *Cirsium oleraceum*:  
477 Implications for the original host shift. *Journal of Insect Science* **8**.
- 478 Diegisser, T., Seitz, A. & Johannesen, J. 2006b. Phylogeographic patterns of host-race  
479 evolution in *Tephritis conura* (Diptera : Tephritidae). *Molecular Ecology* **15**: 681-694.
- 480 Diegisser, T., Seitz, A. & Johannesen, J. 2007. Morphological adaptation in host races of  
481 *Tephritis conura*. *Entomologia Experimentalis Et Applicata* **122**: 155-164.
- 482 Dres, M. & Mallet, J. 2002. Host races in plant-feeding insects and their importance in  
483 sympatric speciation. *Philosophical Transactions of the Royal Society B-Biological*  
484 *Sciences* **357**: 471-492.
- 485 Farrell, B. D. 1998. "Inordinate fondness" explained: Why are there so many beetles? *Science*  
486 **281**: 555-559.
- 487 Feder, J. L., Chilcote, C. A. & Bush, G. L. 1988. Genetic differentiation between sympatric  
488 host races of the apple maggot fly *Rhagoletis pomonella*. *Nature* **336**: 61-64.
- 489 Filchak, K. E., Roethele, J. B. & Feder, J. L. 2000. Natural selection and sympatric  
490 divergence in the apple maggot *Rhagoletis pomonella*. *Nature* **407**: 739-742.
- 491 Funk, D. J., Filchak, K. E. & Feder, J. L. 2002. Herbivorous insects: model systems for the  
492 comparative study of speciation ecology. *Genetica* **116**: 251-267.

- 493 Gavrilets, S. 2004. *Fitness landscapes and the origin of species*. Princeton University Press,  
494 Princeton, N.J.
- 495 Hammer, Ø., Harper, D. A. T. & P. D., R. 2001. PAST: Paleontological Statistics Software  
496 Package for Education and Data Analysis. *Palaeontologica Electronica* **4**: 9.
- 497 Hinojosa, J. C., Koubinova, D., Dinca, V., Hernandez-Roldan, J., Munguira, M. L., Garcia-  
498 Barros, E., . . . Vila, R. 2020. Rapid colour shift by reproductive character  
499 displacement in *Cupido* butterflies. *Molecular Ecology* **29**: 4942-4955.
- 500 Hollinger, I. & Hermisson, J. 2017. Bounds to parapatric speciation: A Dobzhansky-Muller  
501 incompatibility model involving autosomes, X chromosomes, and mitochondria.  
502 *Evolution* **71**: 1366-1380.
- 503 Jackson, D. A. 1993. Stopping rules in principal components-analysis - A comparison of  
504 heuristic and statistical approaches. *Ecology* **74**: 2204-2214.
- 505 Jourdan, J., Krause, S. T., Lazar, V. M., Zimmer, C., Sommer-Trembo, C., Arias-Rodriguez,  
506 L., . . . Plath, M. 2016. Shared and unique patterns of phenotypic diversification along  
507 a stream gradient in two congeneric species. *Scientific Reports* **6**: 38971.
- 508 Kirkpatrick, M. & Ravigne, V. 2002. Speciation by natural and sexual selection: Models and  
509 experiments. *American Naturalist* **159**: S22-S35.
- 510 Kyogoku, D. & Wheatcroft, D. 2020. Heterospecific mating interactions as an interface  
511 between ecology and evolution. *Journal of Evolutionary Biology* **33**: 1330-1344.
- 512 Lackey, A. C. R. & Boughman, J. W. 2017. Evolution of reproductive isolation in stickleback  
513 fish. *Evolution* **71**: 357-372.
- 514 Lamont, B. B., He, T., Enright, N. J., Krauss, S. L. & Miller, B. P. 2003. Anthropogenic  
515 disturbance promotes hybridization between *Banksia* species by altering their biology.  
516 *Journal of Evolutionary Biology* **16**: 551-557.

- 517 Langerhans, R. B. 2018. Predictability and Parallelism of Multitrait Adaptation. *Journal of*  
518 *Heredity* **109**: 59-70.
- 519 Langerhans, R. B. & DeWitt, T. J. 2004. Shared and unique features of evolutionary  
520 diversification. *American Naturalist* **164**: 335-349.
- 521 Linn, C. E., Darnbroski, H. R., Feder, J. L., Berlocher, S. H., Nojima, S. & Roelofs, W. L.  
522 2004. Postzygotic isolating factor in sympatric speciation in *Rhagoletis* flies: Reduced  
523 response of hybrids to parental host-fruit odors. *Proceedings of the National Academy*  
524 *of Sciences of the United States of America* **101**: 17753-17758.
- 525 Loo, W. T., Garcia-Loor, J., Dudaniec, R. Y., Kleindorfer, S. & Cavanaugh, C. M. 2019. Host  
526 phylogeny, diet, and habitat differentiate the gut microbiomes of Darwin's finches on  
527 Santa Cruz Island. *Scientific Reports* **9**: 12.
- 528 Martin, B. T., Douglas, M. R., Chafin, T. K., Jr, J. S. P., Birkhead, R. D., Phillips, C. A. &  
529 Douglas, M. E. 2020. Contrasting signatures of introgression in North American box  
530 turtle (*Terrapene* spp.) contact zones. *Molecular Ecology* **29**: 4186-4202.
- 531 Matsubayashi, K. W., Ohshima, I. & Nosil, P. 2010. Ecological speciation in phytophagous  
532 insects. *Entomologia Experimentalis Et Applicata* **134**: 1-27.
- 533 Mayr, E. 1947. Ecological factors in speciation. *Evolution* **1**: 263-288.
- 534 Mendelson, T. C. 2003. Sexual isolation evolves faster than hybrid inviability in a diverse and  
535 sexually dimorphic genus of fish (Percidae : *Etheostoma*). *Evolution* **57**: 317-327.
- 536 Mendelson, T. C., Martin, M. D. & Flaxman, S. M. 2014. Mutation-order divergence by  
537 sexual selection: diversification of sexual signals in similar environments as a first  
538 step in speciation. *Ecology Letters* **17**: 1053-1066.
- 539 Meyers, P. J., Doellman, M. M., Ragland, G. J., Hood, G. R., Egan, S. P., Powell, T. H. Q., . .  
540 . Feder, J. L. 2020. Can the genomics of ecological speciation be predicted across the  
541 divergence continuum from host races to species? A case study in *Rhagoletis*.

- 542 *Philosophical Transactions of the Royal Society of London B Biological Sciences* **375**:  
543 20190534.
- 544 Mitter, C., Farrell, B. & Wiegmann, B. 1988. The Phylogenetic Study of Adaptive Zones -  
545 Has Phytophagy Promoted Insect Diversification? *American Naturalist* **132**: 107-128.
- 546 Nilsson, P. A., Hulthen, K., Chapman, B., Hansson, L. A., Brodersen, J., Baktoft, H., . . .  
547 Skov, C. 2017. Species integrity enhanced by a predation cost to hybrids in the wild.  
548 *Biology Letters* **13**.
- 549 Nosil, P. 2012. *Ecological speciation*. Oxford University Press, Oxford.
- 550 Nosil, P., Crespi, B. J. & Sandoval, C. P. 2002. Host-plant adaptation drives the parallel  
551 evolution of reproductive isolation. *Nature* **417**: 440-443.
- 552 Nylin, S., Slove, J. & Janz, N. 2014. Host Plant Utilization, Host Range Oscillations and  
553 Diversification in Nymphalid Butterflies: a Phylogenetic Investigation. *Evolution* **68**:  
554 105-124.
- 555 Ortega, J., Chao, Y., Nilsson, KJ., Runemark, A. 2021. Genomic landscape of *Tephritis*  
556 *conura*. [in prep.].
- 557 Pieterse, W., Benitez, H. A. & Addison, P. 2017. The use of geometric morphometric analysis  
558 to illustrate the shape change induced by different fruit hosts on the wing shape of  
559 *Bactrocera dorsalis* and *Ceratitis capitata* (Diptera: Tephritidae). *Zoologischer*  
560 *Anzeiger* **269**: 110-116.
- 561 Porter, C. K. & Benkman, C. W. 2019. Character displacement of a learned behaviour and its  
562 implications for ecological speciation. *Proceedings of the Royal Society B-Biological*  
563 *Sciences* **286**: 10.
- 564 R Core Team (2019) R: A language and environment for statistical computing. pp. R  
565 Foundation for Statistical Computing, Vienna, Austria. URL: [https://www.R-](https://www.R-project.org/)  
566 [project.org/](https://www.R-project.org/).

- 567 Rohlf, J. F. (2017) tpsDig2: Digitize coordinates of landmarks and capture outlines. pp.,  
568 Ecology & Evolution and Anthropology, Stony Brook University.
- 569 Rohlf, J. F. (2018) tpsUtil: Utility program useful when working with tps files. pp., Ecology  
570 & Evolution and Anthropology, Stony Brook University.
- 571 Romstock-Volkl, M. 1997. Host race formation in *Tephritis conura*: determinants from three  
572 trophic levels. *Ecological Studies* **130**: 21-38.
- 573 Roriz, A. K. P., Japyassu, H. F., Caceres, C., Vera, M. T. & Joachim-Bravo, I. S. 2019.  
574 Pheromone emission patterns and courtship sequences across distinct populations  
575 within *Anastrepha fraterculus* (Diptera-Tephritidae) cryptic species complex. *Bulletin*  
576 *of Entomological Research* **109**: 408-417.
- 577 Rundle, H. D. & Nosil, P. 2005. Ecological speciation. *Ecology Letters* **8**: 336-352.
- 578 Rundle, H. D. & Rowe, L. 2018. The contribution of sexual selection to ecological and  
579 mutation-order speciation. *Evolution* **72**: 2571-2575.
- 580 Runemark, A., Brydegaard, M. & Svensson, E. I. 2014. Does relaxed predation drive  
581 phenotypic divergence among insular populations? *Journal of Evolutionary Biology*  
582 **27**: 1676-1690.
- 583 Runemark, A., Gabirot, M. & Svensson, E. I. 2011. Population divergence in chemical signals  
584 and the potential for premating isolation between islet- and mainland populations of  
585 the Skyros wall lizard (*Podarcis gaigeae*). *Journal of Evolutionary Biology* **24**: 795-  
586 809.
- 587 Runemark, A., Sagonas, K. & Svensson, E. I. 2015. Ecological explanations to island  
588 gigantism: dietary niche divergence, predation, and size in an endemic lizard. *Ecology*  
589 **96**: 2077-2092.



- 590 Sanchez-Guillen, R. A., Cordoba-Aguilar, A., Cordero-Rivera, A. & Wellenreuther, M. 2014.  
591 Rapid evolution of prezygotic barriers in non-territorial damselflies. *Biological*  
592 *Journal of the Linnean Society* **113**: 485-496.
- 593 Schluter, D. 1993. Adaptive Radiation in Sticklebacks - Size, Shape and Habitat Use  
594 Efficiency. *Ecology* **74**: 699-709.
- 595 Schluter, D. 2008. *The ecology of adaptive radiation*. Oxford Univ. Press, Oxford.
- 596 Schluter, D. 2009. Evidence for Ecological Speciation and Its Alternative. *Science* **323**: 737-  
597 741.
- 598 Servedio, M. R. & Noor, M. A. F. 2003. The role of reinforcement in speciation: Theory and  
599 data. *Annual Review of Ecology Evolution and Systematics* **34**: 339-364.
- 600 Shelomi, M. 2012. Where Are We Now? Bergmann's Rule Sensu Lato in Insects. *American*  
601 *Naturalist* **180**: 511-519.
- 602 Sivinski, J. 2000. *Breeding habits and sex in families closely related to the Tephritidae:*  
603 *Opportunities for comparative studies of the evolution of fruit fly behavior*. CRC  
604 Press, Boca Raton.
- 605 Sivinski, J. & Pereira, R. 2005. Do wing markings in fruit flies (Diptera : Tephritidae) have  
606 sexual significance? *Florida Entomologist* **88**: 321-324.
- 607 Taylor, E. B., Boughman, J. W., Groenenboom, M., Sniatynski, M., Schluter, D. & Gow, J. L.  
608 2006. Speciation in reverse: morphological and genetic evidence of the collapse of a  
609 three-spined stickleback (*Gasterosteus aculeatus*) species pair. *Molecular Ecology* **15**:  
610 343-355.
- 611 Teets, N. M., Dias, V. S., Pierce, B. K., Schetelig, M. F., Handler, A. M. & Hahn, D. A. 2019.  
612 Overexpression of an antioxidant enzyme improves male mating performance after  
613 stress in a lek-mating fruit fly. *Proceedings of the Royal Society B-Biological Sciences*  
614 **286**: 9.

- 615 Thibert-Plante, X. & Gavrilets, S. 2013. Evolution of mate choice and the so-called magic  
616 traits in ecological speciation. *Ecology Letters* **16**: 1004-1013.
- 617 Uyeda, J. C., Arnold, S. J., Hohenlohe, P. A. & Mead, L. S. 2009. Drift Promotes Speciation  
618 by Sexual Selection. *Evolution* **63**: 583-594.
- 619 Weiner, J. 1994. *The beak of the finch : evolution in real time : an extraordinary scientific*  
620 *adventure story about birds, biology and the origin of species*. Jonathan Cape,  
621 London.
- 622 Wiens, J. J., Lapoint, R. T. & Whiteman, N. K. 2015. Herbivory increases diversification  
623 across insect clades. *Nature Communications* **6**: 7.
- 624 Zelditch, M. L. 2004. *Geometric morphometrics for biologists*. Academic Press, Amsterdam.  
625  
626

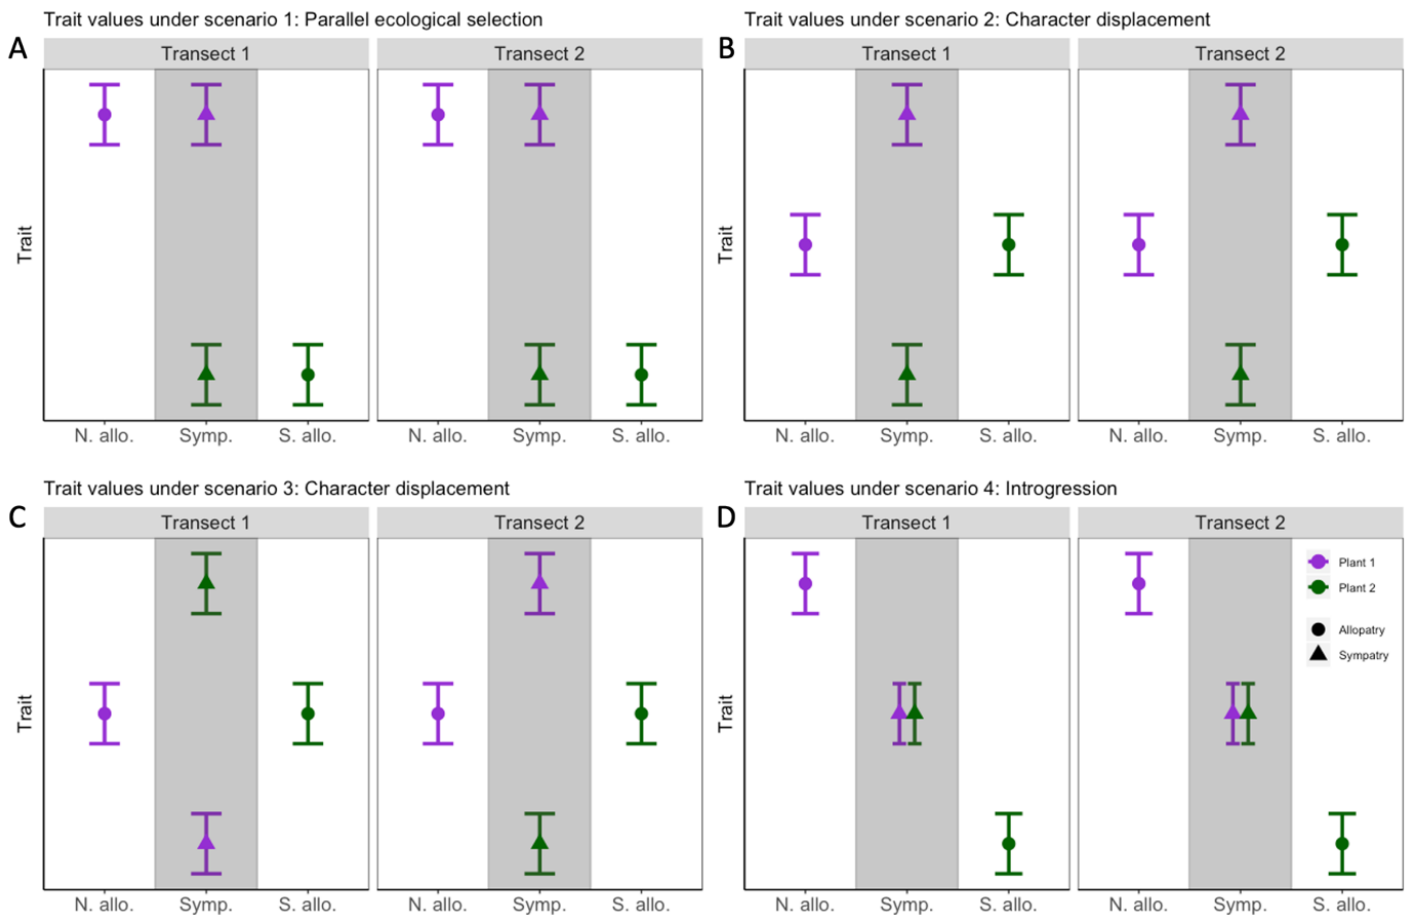

627 **Figure 1: Predictions to adaptation.** Four possible scenarios populations may follow when  
628 faced by ecological or sexual selection under a secondary contact of host races. **A:** Scenario 1,  
629 parallel ecological selection between host races. This scenario would be expected for  
630 ecologically important traits where natural selection imposed by the environment provided by  
631 the host differ. **B:** Scenario 2, character displacement in a shared direction across transects.  
632 Should a sexual character be reinforced by maladaptive hybridization consistently across  
633 transects, this scenario would be expected. **C:** Scenario 3, character displacement in different  
634 directions across transects. This would be expected in a sexual character which is reinforced  
635 by maladaptive hybridization, similarly to Scenario 2, however in this scenario the direction  
636 of adaptation is arbitrary, which would be expected under a mutation order regime. **D:**  
637 Scenario 4, hybridization in sympatric areas is causing introgression resulting in intermediary  
638 traits.

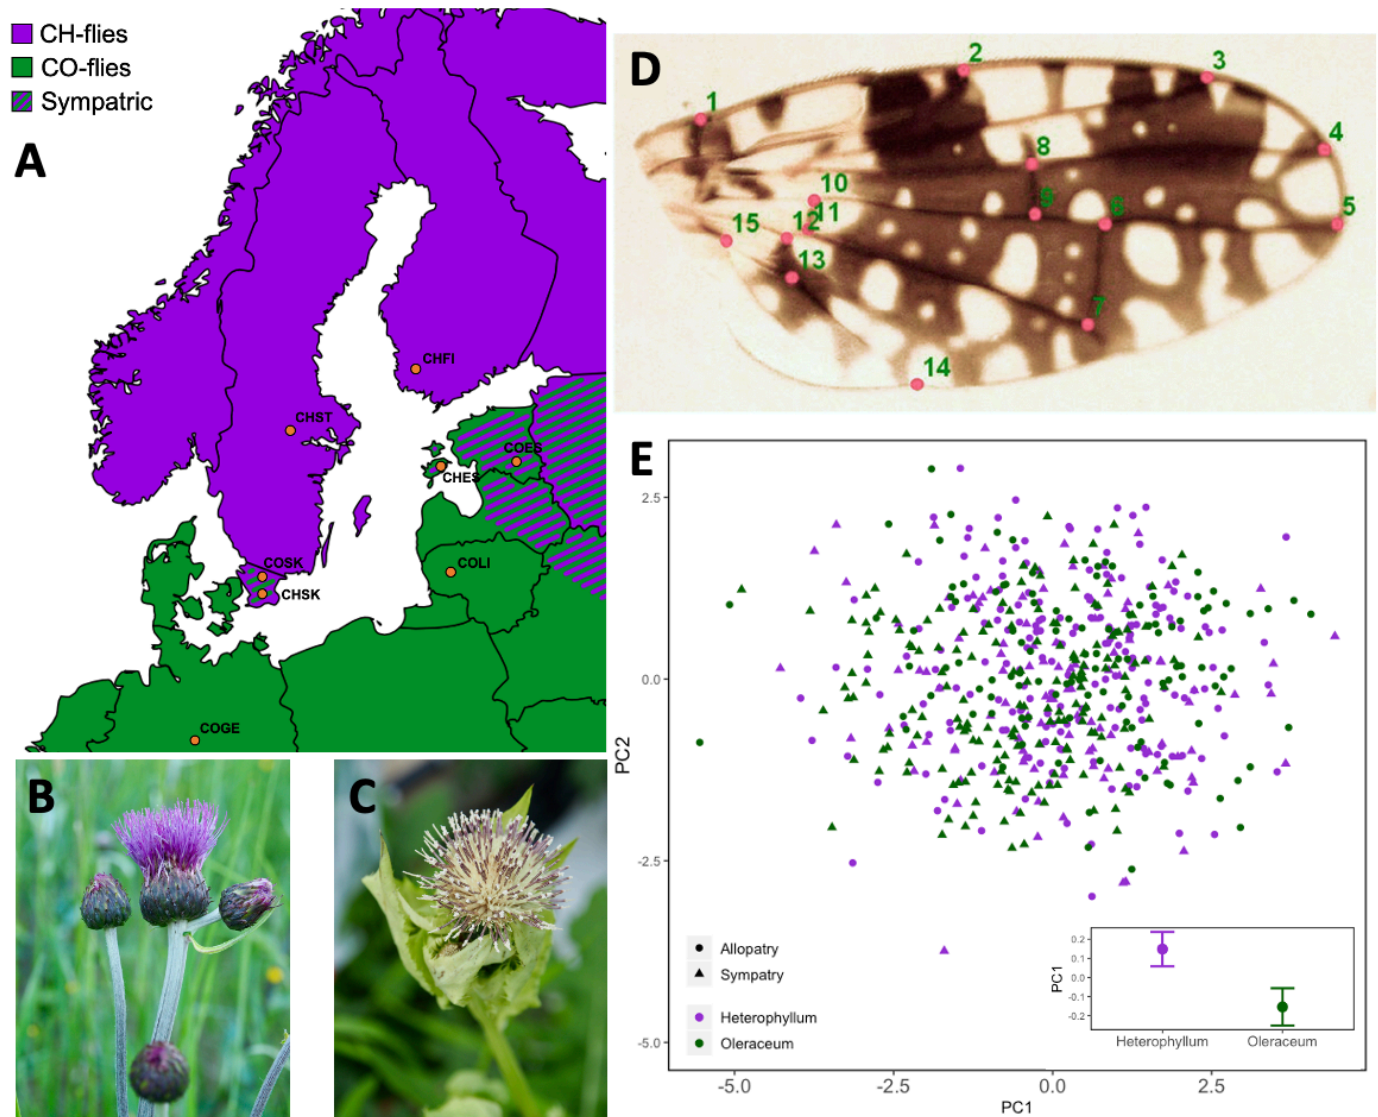

639 Figure 2: **Methods.** **A:** Map showing distribution of *T. conura* host races and our sampling  
640 locations. **B:** *Cirsium heterophyllum*. **C:** *Cirsium oleraceum*. **D:** Dorsal photograph of a *T.*  
641 *conura* wing annotated with 15 landmarks used to analyze wing shape. **E:** Principal  
642 component analysis of *T. conura* individuals measured. The first two principal components  
643 explain 37.84% of all variation. Insert shows the mean and standard error of the mean of PC1  
644 in the host races.

645 Table 1: **Results from MANOVA analysis.** On factors explaining fly host race, whether the  
646 flies were allopatric or sympatric and the interaction of factors.

| MANOVA                    | df  | Pillai | Approx. F | num df | den df | P       |     |
|---------------------------|-----|--------|-----------|--------|--------|---------|-----|
| Host plant                | 1   | 0.237  | 7.66      | 11     | 271    | < 0.001 | *** |
| Co-existence              | 1   | 0.257  | 8.51      | 11     | 271    | < 0.001 | *** |
| Host plant x Co-existence | 1   | 0.154  | 4.42      | 11     | 271    | < 0.001 | *** |
| Residuals                 | 281 |        |           |        |        |         |     |

647

648

649 **Table 2: Post-Hoc ANOVA analyses.** Showing only traits which significantly affected  
 650 differences between groups in the above MANOVA.

| ANOVA              | Independent        | Dependent          | F                  | num df | den df | P       |       |
|--------------------|--------------------|--------------------|--------------------|--------|--------|---------|-------|
| Females            | Host plant         | Ovipositor length  | 43.25              | 1      | 281    | < 0.001 | ***   |
|                    |                    | Wing shape, warp 5 | 8.87               | 1      | 281    | 0.003   | **    |
|                    | Co-existence       | Ovipositor length  | 12.28              | 1      | 281    | < 0.001 | ***   |
|                    |                    | Wing length        | 9.05               | 1      | 281    | 0.003   | **    |
|                    |                    | Wing width         | 17.45              | 1      | 281    | < 0.001 | ***   |
|                    |                    | Melanisation ratio | 9.26               | 1      | 281    | 0.003   | **    |
|                    |                    | Wing shape, warp 2 | 10.84              | 1      | 281    | 0.001   | **    |
|                    |                    | Wing shape, warp 3 | 6.50               | 1      | 281    | 0.011   | *     |
|                    |                    | Wing shape, warp 5 | 12.09              | 1      | 281    | < 0.001 | ***   |
|                    | Interaction        | Body length        | 6.37               | 1      | 281    | 0.012   | *     |
|                    |                    | Wing width         | 5.61               | 1      | 281    | 0.018   | *     |
|                    |                    | Wing shape, warp 1 | 7.42               | 1      | 281    | 0.007   | **    |
|                    |                    | Wing shape, warp 3 | 6.80               | 1      | 281    | 0.01    | **    |
|                    |                    | Wing shape, warp 5 | 6.92               | 1      | 281    | 0.009   | **    |
|                    | Males              | Host plant         | Wing shape, warp 5 | 6.93   | 1      | 284     | 0.009 |
| Co-existence       |                    | Wing length        | 13.79              | 1      | 284    | < 0.001 | ***   |
|                    |                    | Wing width         | 14.35              | 1      | 284    | < 0.001 | ***   |
|                    |                    | Melanisation ratio | 7.14               | 1      | 284    | 0.008   | **    |
|                    |                    | Wing shape, warp 2 | 12.69              | 1      | 284    | < 0.001 | ***   |
|                    |                    | Wing shape, warp 3 | 8.75               | 1      | 284    | 0.003   | **    |
| Wing shape, warp 5 |                    | 5.97               | 1                  | 284    | 0.015  | *       |       |
| Interaction        |                    | Body length        | 11.47              | 1      | 284    | < 0.001 | ***   |
|                    |                    | Wing shape, warp 1 | 5.48               | 1      | 284    | 0.02    | *     |
|                    |                    | Wing shape, warp 3 | 9.17               | 1      | 284    | 0.003   | **    |
|                    | Wing shape, warp 6 | 7.32               | 1                  | 284    | 0.007  | **      |       |

651

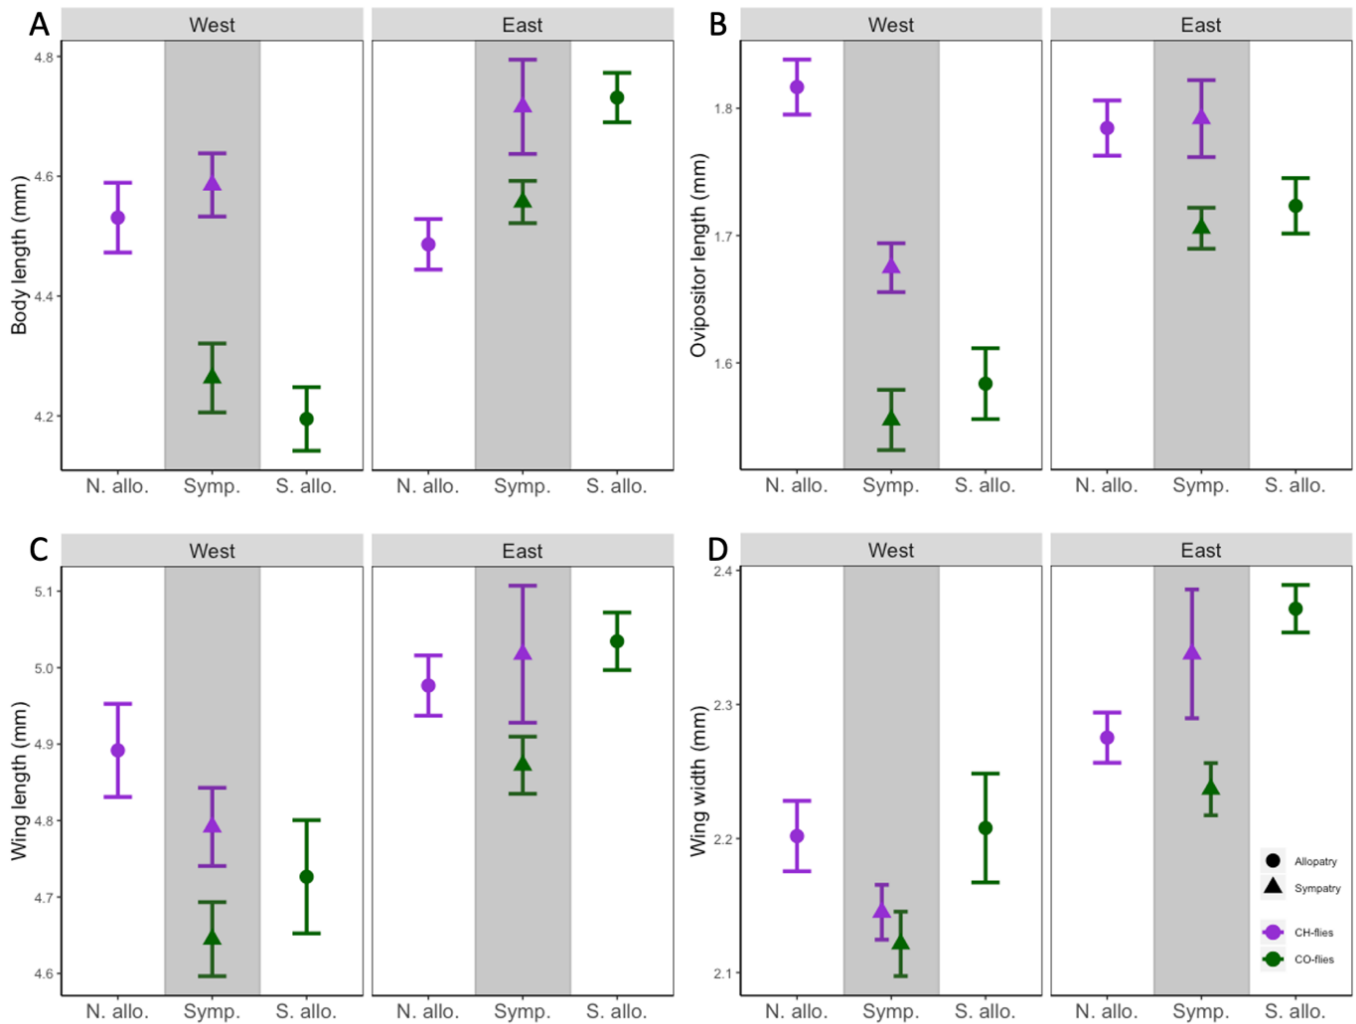

652 Figure 3: **Trait measurements:** All plots portray mean trait values with SE bars of the mean.  
653 Only female *T. conura* are included. ‘West’ and ‘East’ represents from which side of the  
654 Baltic Sea the population is sampled. X axis labels represent which state of co-existence the  
655 fly population is in. ‘N.allo.’ stands for Northern allopatric, ‘Symp.’ stands for sympatric and  
656 ‘S. allo.’ stands for Southern allopatric. **A:** Mean values of *T. conura* body length separated  
657 by population. **B:** Mean values of *T. conura* ovipositor length separated by population. **C:**  
658 Mean values of *T. conura* wing length separated by population. **D:** Mean values of *T. conura*  
659 wing width separated by population.

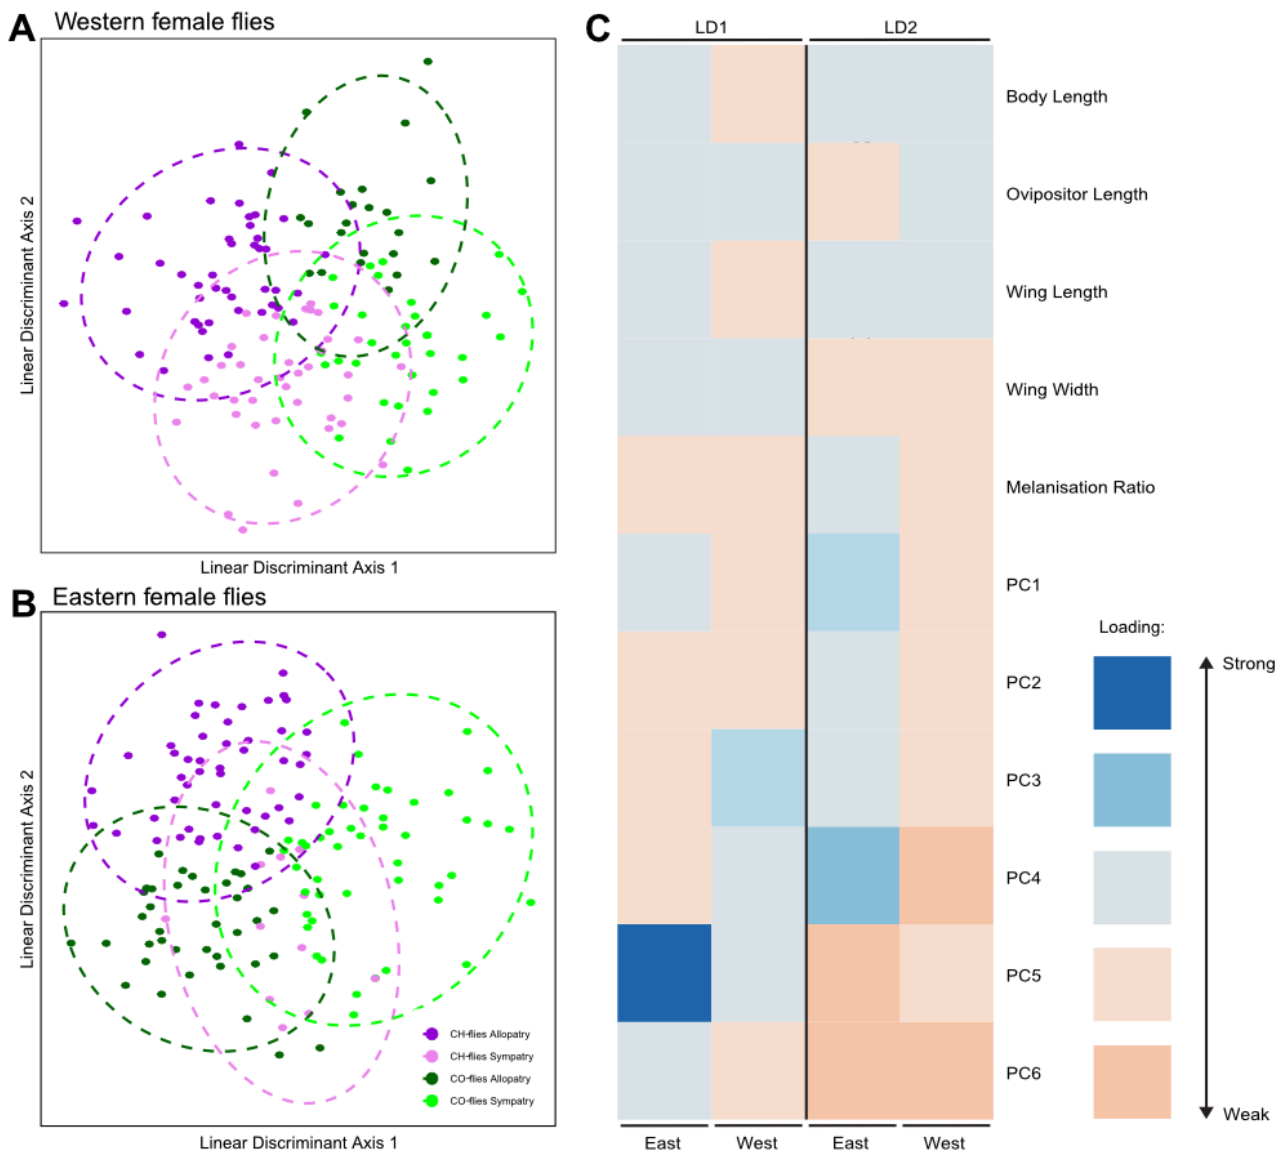

660 Figure 4: **Linear discriminant function analyses and bootstrapped loadings.** All female *T.*  
 661 *conura* included. **A and B:** LDAs showing a different structure when comparing Eastern and  
 662 Western flies **C:** Bootstrapped loadings colored from blue to red based on how much standard  
 663 error surpasses zero or not, where loadings with standard errors which never surpassing zero  
 664 are colored blue. Bootstrap performed with 100 000 replications.
