1 Title: Non-parallel morphological divergence following colonization of a new host plant

2 Authors: Kalle J. Nilsson<sup>1\*</sup>, Jesús Ortega<sup>2</sup>, Magne Friberg<sup>1</sup> & Anna Runemark<sup>1</sup>

3 \* Corresponding author

4 1. Department of Biology, Lund University, Sölvegatan 37, 223 62 Lund, Sweden

5 2. Institute of Evolutionary Biology, Passeig Marítim de la Barceloneta 37-49, 08003

6 Barcelona, Spain

7 Running title: Non-parallel morphological divergence following colonization of a new host

8 Keywords: Parallelism, host plant adaptation, secondary sympatry, adaptation to co-existence

9 Word count: 4993

10 Number of tables and figures: 1 table and 4 figures

11 Number of items in appendix: 17

12 **Abstract**

13 Divergent ecological selection may diversify conspecific populations evolving into different  
14 niches, and may lead to speciation if gene flow is ceased, e.g, due to reinforcement leading to  
15 character displacement. Adaptation to the same niche is expected to be parallel. Whether  
16 selection against maladaptive hybridization in secondary sympatry also results in parallel  
17 divergence in traits that are not directly related to the ecological niches remains an empirical  
18 challenge, although such character displacement can be decisive for if ecotypes develop into  
19 new species. Here, we use a host shift in the phytophagous peacock fly *Tephritis conura*, with  
20 both host races represented in two geographically separate areas East and West of the Baltic  
21 Sea to investigate convergence in morphological adaptations. We asked i) if there are  
22 consistent morphological adaptations to a host plant shift and ii) if the response to secondary  
23 sympatry with the alternate host race is parallel across contact zones. We found surprisingly  
24 low and variable, albeit significant, divergence between host races. Only one trait, the length  
25 of the female ovipositor, which serves an important function in the interaction with the hosts,  
26 was consistently different. Instead, co-existence with the other host race significantly affected  
27 the degree of morphological divergence, but the divergence was largely driven by different  
28 traits in different contact zones. Thus, local stochastic fixation or reinforcement could  
29 generate trait divergence, and additional evidence is needed to conclude whether divergence  
30 is locally adaptive.

## 31 **Introduction**

32 Adaptation to novel niches through ecological selection has been identified as a major driver  
33 of speciation (Schluter 2008; Schluter 2009; Nosil 2012). Classic adaptive radiations  
34 including the Darwin Finches (Weiner 1994; Loo et al 2019), the Hawaiian tarweeds and  
35 silverswords (Baldwin et al 2003) and the recurrent evolution of limnetic-benthic stickleback  
36 pairs (Schluter 1993; Bay et al 2017) are driven by adaptations to novel diets and habitats.  
37 Speciation driven by expansion of novel dietary niches has potential to be rapid, like in  
38 *Rhagoletis* flies, where populations of hawthorn-feeding flies have adapted to use the  
39 introduced apple (*Malus domestica*) as a host during the last 150 years (Bush 1969; Feder et  
40 al 1988; Linn et al 2004; Meyers et al 2020). It remains an empirical challenge to resolve to  
41 which extent morphological adaptations are parallel and predictable under parallel selection  
42 regimes (Bolnick et al 2018). Few studies have explicitly compared parallelism in multiple  
43 traits in such scenarios, but a recent study of Bahamas mosquitofish (*Gambusia hubbsi*)  
44 suggests that only a few traits are highly predictable across parallel predation environments  
45 (Langerhans 2018).

46  
47 Parallelism in response to co-existence with congeners provide a further empirical challenge,  
48 as evolutionary divergence may be affected by the local presence or absence of the other  
49 incipient species (Amarasekare 2003; Calabrese and Pfennig 2020). Reducing gene flow to  
50 populations adapted to other niches is crucial for ecological specialization to result in  
51 diversification, as ecological divergence does not necessarily lead to speciation (Taylor et al  
52 2006; Bolnick 2011; Lackey and Boughman 2017). Divergence and specialization may be  
53 reversed in the absence of reproductive isolation (Taylor et al 2006; Lackey and Boughman  
54 2017). Hence, if reproductive isolation between the incipient species is incomplete, secondary  
55 contact may break up important ecological adaptations. This could be particularly evident

56 when different populations of the diverging species are inhabiting discrete niches, like in the  
57 case of insect host races. Close congeners inhabiting different niches may be poorly adapted  
58 to the alternative environment (Rundle and Nosil 2005; Nilsson et al 2017; Cronemberger et  
59 al 2020; Martin et al 2020), which may lead to reinforcement (Servedio and Noor 2003) and  
60 character displacement with stronger differences in traits involved in mate choice (Hinojosa et  
61 al 2020). While parallel divergence is expected for ecologically selected traits (Fig. 1a), either  
62 parallel- or nonparallel character displacement (Fig. 1b,c) or reduced divergence due to  
63 introgression (Fig. 1d) could be expected for traits that are not strongly coupled with host  
64 plant use.

65

66 To understand whether selection to reduce maladaptive mating in the presence of conspecifics  
67 results in parallel morphological divergence to the same extent as ecological adaptations to a  
68 novel niche, it is necessary to compare patterns of divergence in allopatry and sympatry  
69 across geographic regions. Such studies would test the hypothesis that morphological  
70 responses to sympatry can be more arbitrary than adaptations of ecological traits, which are  
71 expected to diverge in parallel across populations of similar niches (Fig. 1). In particular,  
72 studies asking how co-existence with congeners affects trait distributions, e.g. through  
73 parallel- or non-parallel character displacement (Fig. 1), may provide insight into the nature  
74 of the selection pressures exerted by co-existence of close congeners. Here, we address how  
75 morphological traits evolve and diversify in allopatric and sympatric areas using two host  
76 races of the fly *Tephritis conura*. This species has recently undergone a host shift resulting in  
77 host races specializing on utilizing different *Cirsium* thistle species as larval food plants  
78 (Diegisser et al 2006a; Diegisser et al 2006b; Diegisser et al 2007; Diegisser et al 2008).

79

80 Macroevolutionary analyses reveal that host plant driven speciation, as in the case of *T.*  
81 *conura*, is one of the main factors explaining the tremendous diversity of phytophagous  
82 insects as many speciation events can be attributed to host plant shifts (Berlocher and Feder  
83 2002; Dres and Mallet 2002; Nylin et al 2014). Moreover, diversification rates are elevated in  
84 herbivorous insects compared to their non-herbivorous relatives (Mitter et al 1988; Farrell  
85 1998; Wiens et al 2015). For an insect specialist like *T. conura*, the host plant provides a  
86 discrete environment imposing a multidimensional selection pressure. Hence, insect host plant  
87 adaptations are predicted to affect multiple traits involved in e.g. phenological matching,  
88 female host preference and larval performance (Matsubayashi et al 2010). The putatively  
89 strong selection pressures involved in host plant adaptation provide a strong prediction of  
90 parallelism in host-use related traits of phytophagous insects at early stages of the speciation  
91 process (Nosil et al 2002; Meyers et al 2020). However, the prediction is less straightforward  
92 for responses to sympatry, because the traits involved in putative reinforcement are not  
93 necessarily associated with host use.

94  
95 *Tephritis conura* provides an excellent system for studying parallelism in divergence in  
96 response to ecological adaptation and co-existence with congeners, as it enables comparisons  
97 of trait variation across replicated sympatric and allopatric settings. The two recently  
98 established host races inhabit two geographically isolated sympatric zones with adjacent  
99 allopatric populations, one East and one West of the Baltic Sea (Fig. 2a). *Tephritis conura*  
100 females of the two host races are ovipositing into buds of either *C. heterophyllum* (the  
101 ancestral host; Fig. 2b) or *C. oleraceum* (the novel host; Fig. 2c), and larvae show host  
102 specific performance and survival (Diegisser et al 2008). Hence, the system enables  
103 investigating response to sympatry across two geographically separated contact zones.  
104 Specifically, we test the hypotheses (i) that there are consistent morphological responses to a

105 host plant shift across the Eastern and Western areas and (ii) that responses to sympatry are  
106 parallel in the two contact zones. Given the consistent genetic differentiation between host  
107 races both in allopatry and sympatry (Diegisser et al 2006a; Ortega et al *in prep*) we predict  
108 the host races to be morphologically divergent, and this divergence to be consistent across  
109 geographical settings. As larval survival is strongly reduced in the alternate host (Diegisser et  
110 al 2008), we predict hybridization to be maladaptive, potentially resulting in reinforcement  
111 and character displacement between the host specialists in sympatry.

112

## 113 **Methods**

### 114 **Study species and sampling**

115 The dipteran *T. conura* infest several species of the thistle genus *Cirsium* (Asteraceae)  
116 (Romstock-Volkl 1997). Adult *T. conura* oviposit into thistle buds during early summer,  
117 wherein the adolescent flies remain during larval development and pupation. *Tephritis conura*  
118 infesting *Cirsium heterophyllum*, the melancholy thistle, have recently colonized and adapted  
119 to *Cirsium oleraceum*, the cabbage thistle. Haplotype analyses suggest that a peripatric host  
120 shift took place during the last ice age in the Alps (Diegisser et al 2006b). The two host races  
121 are largely reproductively isolated, but there is evidence of some small amounts of gene flow  
122 (Diegisser et al 2006b). The flies infesting *C. oleraceum* have adapted ecologically to the  
123 smaller bud sizes (Diegisser et al 2007), and have a significantly shorter ovipositor to body  
124 size ratio. Another variable character is wing pigmentation. Wing patterns in Tephritid flies  
125 have been suggested to be under sexual selection, as males perform dances with their wings to  
126 attract females (Sivinski and Pereira 2005). Tephritid males attempting to initiate copulation  
127 situate themselves in front of female flies and posture with their wings (Sivinski 2000; but see  
128 Briceno and Eberhard 2017). We therefore have reason to assume that ecological selection  
129 pressures are more important for size traits in general, and for ovipositor length in particular,

130 while wing traits are more likely shaped by sexual selection. For simplicity, we refer to flies  
131 infecting *C. heterophyllum* as CH-flies, while the flies infecting *C. oleraceum* will be denoted  
132 CO-flies.

133

134 We used a parallel sampling design to examine phenotypic adaptation to a novel host plant  
135 and effects of co-existence between host races, by sampling each host race both in sympatry  
136 and allopatry on each side of the Baltic (Fig. 2a). We collected thistle buds infested by *T.*  
137 *conura* larvae/pupae and allowed the adults to eclose in a common environment. CO-fly  
138 larvae were sampled in Germany and Lithuania (allopatric areas), and both host races were  
139 collected in sympatric areas in southern Sweden and Estonia. Allopatric CH-fly larvae were  
140 sampled in central-Sweden and Finland (Fig. 2a, Table S1). All sampling took place during  
141 June and July 2018. The sampling scheme enables examining to what extent patterns of  
142 phenotypic divergence are explained by host plant adaptations, by co-existence with the other  
143 host race, and if these patterns differ between the two transects. Typically, *C. heterophyllum*  
144 and *C. oleraceum* do not grow in the same microhabitat. Thus, the sympatric and allopatric  
145 definitions here refer to the presence of one or both thistle species in a region (Fig. 2a).

146

#### 147 **Morphological measurements**

148 *Tephritis conura* adults eclosed from field-collected thistle buds in a common lab  
149 environment, (see Supplementary material S1). One male and one female per bud were  
150 euthanized by freezing a few days after emergence and subsequently included in the  
151 morphological analysis. For each individual, we took magnified photographs using a  
152 Celestron 44308 USB microscope. We photographed a lateral image of the fly body after  
153 removal of the wings and a dorsal image of the right wing on a transparent background to  
154 allow better visibility of the wing veins. Body length and ovipositor length were measured

155 digitally from lateral photographs (Fig. S1). We placed 14 landmarks, adapted from Pieterse  
156 et al. (2017), digitally on the dorsal wings (Fig. 2d,S2) for geometric morphometrics (Zelditch  
157 2004). We added a landmark; number 15, to reflect the high variance in the proximal area on  
158 the wing. Digitization was performed in TPSDig2 v2.31(Rohlf 2017) and we used TPSUtil  
159 v1.76 (Rohlf 2018) for file handling. Wing melanisation was measured with an automated  
160 script without any user queries developed in MATLAB (Matlab 2017). As the wings do not  
161 display any chromaticity, analysis is based on the red spectral band only. The script extracted  
162 the intensity of the red spectral band for each pixel, and performed white calibration by  
163 division with the statistical mode corresponding to the white background of the images.  
164 Subsequently, images were inverted to represent absorbance rather than reflectance, so the  
165 melanised wing would extend from the white background (set to zero). The script identified  
166 the wing and separated melanised areas from non-melanised areas, and the size of these areas  
167 were divided to estimate the fraction of the wing that was melanised.

168

### 169 **Statistical analysis**

170 We used PAST3 v3.20 (Hammer et al 2001) to apply a Procrustes fit to the landmark data to  
171 align and scale the wings (Fig. 2d). To produce relative warps (i.e. principal components of  
172 shape) to compare shape between groups, a wing-shape principal component analysis (PCA)  
173 was performed with the Procrustes fitted data using PAST3 v3.20 (Hammer et al 2001) (Fig.  
174 S3). Based on the variance explained by the eigenvalues (Fig. S4) and the broken stick  
175 criterion (Jackson 1993), six relative warps, principal components of shape, which jointly  
176 explain 68% of the wing shape variance were identified (Fig. S5). These relative warps were  
177 included in subsequent analyses of phenotypic divergence to represent wing shapes. All  
178 subsequent statistical analysis were performed in the statistical software R (R Core Team  
179 2019).



180

181 We quantified five morphological traits (body length, ovipositor length, wing length, wing  
182 width and melanisation ratio) in addition to wing shape (represented by relative warps  
183 produced from landmark analysis) for 583 flies. As an exploratory analysis to investigate  
184 whether host race was the major factor explaining variation in fly morphology, we performed  
185 a full PCA on the variables fly body length (mm), wing length (mm), wing width (mm), wing  
186 melanisation ratio (%) and relative warps 1-6 reflecting wing shape, excluding ovipositor  
187 length to be able to include both sexes. We identified four significant dimensions of variation  
188 from the full PCA analysis using the broken stick criterion (Jackson 1993) (Fig. S6).

189 Collectively, these full PCA-axes explained 78% of the morphological variance in the dataset.

190

191 To formally test if the two host races were significantly differentiated, we applied a  
192 multivariate analysis of variance (MANOVA), with all variables measured included as  
193 response variables (body length, ovipositor length, wing width, wing length, wing  
194 melanisation and PC1-6 of wing shapes). To further test if the patterns of morphological  
195 adaptation were parallel in the Eastern and the Western transects, and explicitly address if co-  
196 existence affected host plant races in the same way in these replicates, we performed a full  
197 MANOVA with host race, co-existence and geographical setting and their 3-way and 2-way  
198 interactions as factors. The MANOVAs were performed separately on females and males as  
199 this enabled including the biologically important trait ovipositor length (Diegisser et al 2007)  
200 in analyses of females. This division of sexes reduced the multicollinearity of explanatory  
201 factors to below recommended values (Hair, 2010).

202

203 To further investigate parallelism in differentiation of the host race pairs, we applied separate  
204 linear discriminant function analyses (LDAs) on the data from the Eastern and Western

205 transects. We used host races and co-existence with the other host race as factors in the  
206 models. This analysis was performed on males and females separately. To test if the patterns  
207 of divergence differed significantly between transects, we performed each LDA 10,000 times  
208 using the bootstrap R package ‘boot’ (Canty and Ripley 2020) and used the confidence  
209 intervals to assess if the loadings differed between analyses. In addition, we assessed the  
210 proportions of divergence that is shared among host races and unique among the populations,  
211 respectively, in a nested MANOVA using size and shape variables against host race and  
212 transect following Langerhans & DeWitt (2004).

213

## 214 **Results**

215 We found no strong evidence for separation between host races along the two major axes of  
216 divergence when including both sexes (Fig. 2e). CO-flies had, on average, lower values of  
217 PC1 compared to CH-flies, reflecting smaller body and wing size, as predominantly size  
218 variables load positively on PC1 (GLM:  $F_{1, 581} = 5.189$ ,  $p = 0.023$ ; Fig. 2e; Table S2). The  
219 significant host race differences also hold true in a more complex model, including co-  
220 existence and geographic origin (see below; Table 1). However, the difference between host  
221 races was small compared with the variation among populations within host races. There was  
222 no separation between host races along the second PC axis, with higher values representing  
223 higher wing melanisation and lower representation of wings that are larger than average in the  
224 distal and proximal areas of the wing, while being smaller in the posterior area, see relative  
225 warp 5 in Fig. S5.

226

227 Intriguingly, host plant and co-existence affected female morphology differently East and  
228 West of the Baltic Sea, as illustrated by a significant 3-way interaction (Pillai’s trace = 0.117,  
229  $F_{11, 277} = 3.22$ ,  $p < 0.001$ ; Table 1). All main effects and 2-way interactions were also

230 significant in the full model (Table 1). These patterns hold true also for males (Pillai's trace =  
231 0.092,  $F_{10, 271} = 2.74$ ,  $p = 0.003$ ; Table 1). Hence, depending on geography, host race and co-  
232 existence affected fly morphology differently. Co-existence with the other host race decreased  
233 morphological divergence in both females and males (Pillai's trace = 0.295,  $F_{11, 277} = 10.15$ ,  $p$   
234  $< 0.001$  and Pillai's trace = 0.194,  $F_{10, 271} = 6.54$ ,  $p < 0.001$  respectively), and flies from the  
235 two transects differed significantly in morphology for both sexes (Pillai's trace = 0.374,  $F_{10,$   
236  $271 = 14.52$ ,  $p < 0.001$  for females and Pillai's trace = 0.393,  $F_{10, 271} = 17.51$ ,  $p < 0.001$  for  
237 males).

238

239 Interestingly, host race differences in females depend on co-existence, with CO-fly females  
240 becoming more similar in sympatry compared to CH-fly females (Pillai's trace = 0.218,  $F_{11,$   
241  $277 = 6.79$ ,  $p < 0.001$ ; Tables 1 and S3; Fig. 3 and S7). In contrast to females, co-existence  
242 affected CO-fly males more strongly, with CO-fly males becoming more similar to CH-fly  
243 males in sympatry whereas CH-fly males were more similar across all populations (Pillai's  
244 trace = 0.179,  $F_{10, 271} = 5.92$ ,  $p < 0.001$ ; Tables 1 and S3; Fig. S8-S11). The differences  
245 between host races varied between transects in females, with a stronger host race divergence  
246 in the Western than the Eastern transect (Pillai's trace = 0.18,  $F_{11, 277} = 6.79$ ,  $p < 0.001$ ; Tables  
247 1 and S3; Fig. 3 and S7; Tables 1 and S3; Fig. 3 and S7). This pattern holds true also for  
248 males (Pillai's trace = 0.16,  $F_{10, 271} = 5.12$ ,  $p < 0.001$ ; Tables 1 and S3; Fig. S8-S11). Finally,  
249 the differences between allopatric and sympatric populations are stronger in Western flies  
250 compared to Eastern both in females (Pillai's trace = 0.163,  $F_{11, 277} = 4.74$ ,  $p < 0.001$ ; Tables 1  
251 and S3; Fig. 3 and S7) and males (Pillai's trace = 0.131,  $F_{10, 271} = 4.1$ ,  $p < 0.001$ ; Tables 1 and  
252 S3; Fig. S8-S11).

253

254 To assess how much of the female divergence was unique and shared between host races we  
255 also estimated Wilk's partial  $\eta^2$ . While a high share of the partial variance was explained by  
256 shared divergence between host races ( $F_{11,273} = 4.96$ , 30.6%) and transect specific patterns of  
257 host race divergence ( $F_{11,273} = 3.81$ , 25.3%), divergence between transects explained the  
258 highest percentage of partial variance ( $F_{11,273} = 6.85$ , 37.8% (Table S4).

259

260 As host race affected morphology differently depending on geography, we further tested if the  
261 major axis of divergence separated host races in both transects, and if the same traits  
262 separated groups using a Linear Discriminant Analysis (LDA). This analytical approach  
263 revealed that the importance of host race for population separation differed between transects.  
264 In the Western LDA, host races separated along the first discriminant axis whereas the  
265 sympatric and allopatric populations separated along the second discriminant axis (Fig. 4). In  
266 the Eastern LDA, the first discriminant instead divided the two CO-fly populations and the  
267 second discriminant axis divided the two CH-fly host race populations (Fig. 4). These  
268 analyses also revealed that the host races from transects East and West of the Baltic had  
269 diverged in different sets of characters as bootstrap loadings from the two LDAs show that  
270 different characters loaded on the first discriminant axes (Table S5). For the Eastern transect,  
271 body length and wing warp 6 had positive loadings, and wing size, ovipositor length and wing  
272 warp 1 had negative loadings on LD1, whereas for the Western transect, LD1 had positive  
273 loadings for wing width and shape. In the Eastern transect, wing shape, body length and wing  
274 width had negative loadings, but wing length positive loadings on LD2, while for the Western  
275 transect body length, ovipositor length and wing lengths loaded positively on LD2. Wing  
276 warp 5 loaded positively on LD1 for both transects, but the loading was substantially stronger  
277 for Western populations.

278

279 **Discussion**

280 Contrary to previous studies that found clear differences between the *T. conura* host races  
281 (Diegisser et al 2007) we found low and variable morphological differentiation. The  
282 multivariate differentiation between host races was driven by subtle differences across many  
283 traits, and the traits that were divergent between host races differed in the two transects. Host  
284 races separated slightly but significantly along the main axis of variation, reflecting mainly  
285 ovipositor length differences, with CH-fly ovipositors being slightly longer than CO-fly  
286 ovipositors, but with unexpected substantial variation among populations. Previous work on  
287 the *T. conura* host races has reported consistent divergence for loci inferred to be involved in  
288 host plant adaptation (*Peptidase D* and *Hexokinase*; see (Diegisser et al 2006b), and recently  
289 obtained whole genome data (Ortega et al *in prep*) support the presence of discrete genetic  
290 clusters for each host race. Moreover, the flies also have poor performance on the alternate  
291 host plant (Diegisser et al 2008). In light of this, the utterly moderate and variable host race  
292 divergence in morphology was unexpected. However, our findings are in line with the  
293 observation that parallelism in fitness is typically higher than parallelism in both phenotypic  
294 divergence and genetic divergence (Bolnick et al 2018). Patterns of parallel divergence only  
295 in traits under very strong ecological selection is consistent with the findings of parallelism in  
296 response to different predation regimes in Bahamas Mosquitofish (Langerhans 2018), where  
297 only a few traits show highly predictable patterns of diversification. Hence, at early stages of  
298 diversification driven by ecological adaptation, parallelism may be high only for traits that are  
299 strongly coupled to the ecological factor that adaptively diversify the incipient species.

300

301 We find that two out of five female traits, ovipositor length and body length, match a parallel  
302 divergence scenario, and body length only in the Western transect (Fig. 1a). Hence, the degree  
303 of parallelism among host races in morphological divergence was lower than expected.

304 Ovipositor length was significantly diverged between host races, but the strength of  
305 divergence differed between sympatric and allopatric populations as well as between the  
306 Eastern and Western populations. In Western populations, the sympatric CH-fly population  
307 has intermediate ovipositor lengths, whereas CO-flies and Eastern CH-flies show parallel  
308 ecological divergence between sympatry and allopatry, corresponding to the expectations  
309 under parallel ecological selection (Fig. 1a). The intermediate measurements for traits found  
310 in the Western CH-flies could suggest selection for shorter ovipositors in sympatry, or reflect  
311 introgression. We find host race divergence in body size, with clear host race differences in  
312 body length in the Western transect (corresponding to Fig. 1a), while Eastern flies have a  
313 shuffled distribution of body sizes. Size typically varies with temperature in insects (Atkinson  
314 1994; but see Shelomi 2012). While the parallel sampling design would partly correct for  
315 temperature effects, temperature could still differ between the Eastern and Western transects.  
316  
317 When we jointly investigated effects of co-existence, geographic origin and their interactions  
318 on host race divergence, we found that both co-existence with the other host race and whether  
319 the population originate from East or West of the Baltic Sea affected morphology (Fig. 3).  
320 Hence, the low host race divergence may, to a high extent, be explained by interacting effects  
321 of co-existence with the other host race, with non-parallel patterns of divergence in the two  
322 transects, which could indicate a mutation order scenario (Fig. 1c) (Mendelson et al 2014). If  
323 reinforcement due to maladaptive hybridization would have been a prominent force acting on  
324 the *T. conura* host races, we would expect traits to be more divergent between host races in  
325 sympatry compared to allopatry, i.e. for character displacement to arise (Comeault et al 2016;  
326 Calabrese and Pfennig 2020; Kyogoku and Wheatcroft 2020; Fig. 1b,c). This was generally  
327 not the case. Instead, the most common pattern was that traits in sympatric populations are  
328 more similar between host races than traits in allopatry. Contrary to our expectations, based

329 on the fact that *Tephritid* flies perform a mating ritual that includes elaborate wing  
330 movements from both sexes during courtship (Sivinski 2000; but see Briceno and Eberhard  
331 2017), this pattern was strongest for wing morphology traits. This is the opposite of what  
332 would be predicted under a reinforcement scenario but consistent with introgression (Fig. 1d),  
333 as found by Ortega et al. [*in prep.*], or effects of a shared environment.

334

335 Wing size was most strongly affected by co-existence. Interestingly, wing length was overall  
336 significantly shorter in sympatry than in allopatry, consistent on both sides of the Baltic Sea.  
337 Disproportionally shorter wing length in relation to body size could be consistent with  
338 selection for shorter dispersal distances (Claramunt et al 2012), potentially to avoid dispersal  
339 to the alternate host plant which could lead to maladaptive introgression. We also found  
340 patterns consistent with character displacement, as sympatric flies have similarly narrower  
341 wings than their respective allopatric counterparts in the Western transect. In contrast, Eastern  
342 sympatric CH-flies have broader and sympatric CO-flies narrower wings. These observations  
343 are consistent with a mutation order scenario, where the difference may be important but the  
344 specific trait or direction of the difference is arbitrary (Mendelson et al 2014). Some degree of  
345 sexual selection may further differentiate populations under a mutation order scenario  
346 (Rundle and Rowe 2018), underlining the need to investigate if there is sexual selection at  
347 work in this system and disentangling how it would operate.

348

349 Contrary to studies of parallelism in sexually selected traits in ecotypes in e.g. sticklebacks  
350 (Boughman et al 2005), we find mixed evidence for parallelism. While shared host race  
351 divergence constituted the main share of variation, and host races are separated by the main  
352 discriminant axis in the Western transect, host race was a less important predictor of  
353 divergence in the Eastern transect where the two CO-fly populations instead separate along

354 the first discriminant axis. The traits that differ between host races also differs between our  
355 two geographic replicates. The differences in patterns between the transects East and West of  
356 the Baltic Sea could have several additional or alternative explanations related to  
357 demographic history, population size and the extent to which the host plant races co-exist  
358 locally. Possibly, one contact zone may be older than the other and populations in older  
359 sympatry would have had more time for character displacement to develop. Alternatively, if  
360 the Eastern transect has a higher proportion suitable thistle habitat, this could have increased  
361 both within- and between host race connectivity and potentially gene flow (Servedio and  
362 Noor 2003). Genetic data and detailed analyses of introgression should be used to resolve  
363 whether selection against hybridization could be expected.

364

365 Morphological differentiation does not always strongly reflect even crucial ecological  
366 adaptations. For instance, cultural evolution contributes to reproductive isolation in *Cassia*  
367 crossbills, *Loxia sinesciuris* (Porter and Benkman 2019) and *Rhagoletis pomonella* have  
368 adapted their phenologies to host fruits ripening at different times of the year (Filchak et al  
369 2000). Another potential explanation to the low consistency of host race divergence may be  
370 the traits included in this analysis. Females were more diverged than males likely as  
371 ovipositor length was differentiated, consistent with previous findings (Diegisser et al 2007).  
372 These findings are similar to those of Jourdan et al. (2016) where divergence in female  
373 mosquitofishes (*Gambusia*) divergence was more parallel than male divergence. Potentially,  
374 the other traits measured are not important enough for host plant adaptation to result in  
375 strongly parallel divergence.

376

377 Traits that have been shown to differ strongly between host races include female ovipositor  
378 length (Diegisser et al 2007) and the larval ability to survive on the different host plant



379 species (Diegisser et al 2008). A performance experiment showed low viability of *T. conura*  
380 larvae adapted to *C. heterophyllum* when reared on *C. oleraceum* (Diegisser et al 2008). Thus,  
381 the larval ability to process plant tissue is likely under strong selection, and expected to show  
382 similar patterns across populations. Furthermore, host plant preference may have a potential  
383 to act as a magic trait (Gavrilets 2004; Thibert-Plante and Gavrilets 2013) in *T. conura*,  
384 separating the habitats of the populations and simultaneously providing reproductive isolation  
385 as these flies mate on their host plant (Diegisser et al 2007). Finally, we cannot rule out that  
386 other, unmeasured traits are important for sexual selection, as pheromones have been  
387 suggested to play a role in tephritid mate choice (Roriz et al 2019), as well as overexpression  
388 of antioxidants, which have been shown to increase male performance under certain  
389 conditions (Teets et al 2019). Regardless of the exact selection pressures acting on our set of  
390 study traits, our findings are important, because they show a context dependence for host race  
391 adaptation. Parallelism was found only in ecologically strongly selected traits, whereas we  
392 found non-parallel changes, some consistent with character displacement for other traits.  
393 These insights should guide the design and interpretation when studying ecologically driven  
394 divergence.

395

396 In conclusion, our work suggests that morphological responses to niche shifts can be highly  
397 context dependent. Co-existence with closely related congeners and demographic origin may  
398 affect easily measured morphological characters, potentially masking underlying parallelism  
399 in traits important for adaptation to specific niches. Moreover, we find intriguing patterns of  
400 non-parallel divergence to co-existence in the two geographic replicas, suggesting that  
401 mutation order dependent divergence potentially could lead to different solutions to avoid  
402 introgression in independent contact zones.

403

404 **Acknowledgements**

405 We thank Mikkel Brydegaard for help with automatizing wing color analysis, Jes Johannesen  
406 for helpful advice on *Tephritis conura* ecology, Øystein Opedal for helpful statistical  
407 discussions, Jodie Lilley, Emma Kärrnäs and Mathilde Schnuriger for help during field- and  
408 lab work, and the members of the Lund University research group on the Evolutionary  
409 Ecology of Plant-Insect Interactions for valuable discussions on earlier drafts of this  
410 manuscript. This study was financed by a Wenner-Gren Fellowship, a Crafoord grant and a  
411 Swedish Research Council grant to AR.

412

413 **Declarations**

414

415 **Funding**

416 This study was financed by a Wenner-Gren Fellowship, a Crafoord grant and a Swedish

417 Research Council grant to AR.

418 **Conflicts of interest**

419 The authors declare no conflicts of interest.

420 **Ethics approval**

421 Not applicable

422 **Consent to participate**

423 All co-authors consent to participation.

424 **Consent for publication**

425 All co-authors consent to publication.

426 **Availability if data and material**

427 All data will be deposited in dryad (upon acceptance of the MS).

428 **Code availability**

429 The code used to analyse data is available at [github.com/kalnil/tephritis](https://github.com/kalnil/tephritis).

430 **Author contribution**

431 A.R conceived and designed the study. KJ.N., J.O. and A.R. performed the field work. KJ.N.

432 reared the flies, quantified the morphological traits and performed the statistical analyses,

433 with advice from A.R. and M.F. KJ.N. wrote a draft of the manuscript. A.R. and M.F. helped

434 writing the manuscript and all co-authors commented on and approved the final version of the

435 manuscript.

436

437 **References**

- 438 Amarasekare P (2003) Competitive coexistence in spatially structured environments: A  
439 synthesis. *Ecology Letters* 6:1109-1122
- 440 Atkinson D (1994) Temperature and organism size - A biological law for ectotherms. In:  
441 Begon M & Fitter AH (eds) *Advances in Ecological Research*, vol 25. Academic Press  
442 Ltd-Elsevier Science Ltd, London, pp1-58
- 443 Baldwin BG, Carlquist S & Carr GD 2003 *Tarweeds & silverswords: evolution of the*  
444 *Madiinae (Asteraceae)*. Missouri Botanical Garden Press, St. Louis, Mo.
- 445 Bay RA, Arnegard ME, Conte GL, Best J, Bedford NL, McCann SR, Dubin ME, Chan YF,  
446 Jones FC, Kingsley DM, Schluter D & Peichel CL (2017) Genetic coupling of female  
447 mate choice with polygenic ecological divergence facilitates stickleback speciation.  
448 *Current Biology* 27:3344-3349
- 449 Berlocher SH & Feder JL (2002) Sympatric speciation in phytophagous insects: Moving  
450 beyond controversy? *Annual Review of Entomology* 47:773-815
- 451 Bolnick DI (2011) Sympatric speciation in threespine stickleback: Why not? *International*  
452 *Journal of Ecology* 2011:e942847
- 453 Bolnick DI, Barrett RDH, Oke KB, Rennison DJ & Stuart YE (2018) (Non)Parallel evolution.  
454 *Annual Review of Ecology, Evolution, and Systematics* 49:303-330
- 455 Boughman JW, Rundle HD & Schluter D (2005) Parallel evolution of sexual isolation in  
456 sticklebacks. *Evolution* 59:361-373
- 457 Briceno RD & Eberhard WG (2017) Copulatory dialogues between male and female tsetse  
458 flies (*Diptera: Muscidae: Glossina pallidipes*). *Journal of Insect Behavior* 30:394-408
- 459 Bush GL (1969) Sympatric host race formation and speciation in frugivorous flies of genus  
460 *Rhagoletis (Diptera, Tephritidae)*. *Evolution* 23:237-251

- 461 Calabrese GM & Pfennig KS (2020) Reinforcement and the proliferation of species. Journal  
462 of Heredity 111:138-146
- 463 Canty A & Ripley BD (2020) boot: Bootstrap R (S-Plus) functions. R package version 1.3-25.
- 464 Claramunt S, Derryberry EP, Remsen JV, Jr. & Brumfield RT (2012) High dispersal ability  
465 inhibits speciation in a continental radiation of passerine birds. Proceedings of the  
466 Royal Society B-Biological Sciences 279:1567-1574
- 467 Comeault AA, Venkat A & Matute DR (2016) Correlated evolution of male and female  
468 reproductive traits drive a cascading effect of reinforcement in *Drosophila yakuba*.  
469 Proceedings of the Royal Society B-Biological Sciences 283:20160730
- 470 Cronemberger AA, Aleixo A, Mikkelsen EK & Weir JT (2020) Postzygotic isolation drives  
471 genomic speciation between highly cryptic *Hypocnemis* antbirds from Amazonia.  
472 Evolution 74:2512-2525
- 473 Diegisser T, Johannesen J & Seitz A (2006a) The role of geographic setting on the  
474 diversification process among *Tephritis conura* (*Tephritidae*) host races. Heredity  
475 96:410-418
- 476 Diegisser T, Johannesen J & Seitz A (2008) Performance of host-races of the fruit fly,  
477 *Tephritis conura* on a derived host plant, the cabbage thistle *Cirsium oleraceum*:  
478 Implications for the original host shift. Journal of Insect Science 8:1-6
- 479 Diegisser T, Seitz A & Johannesen J (2006b) Phylogeographic patterns of host-race evolution  
480 in *Tephritis conura* (*Diptera: Tephritidae*). Molecular Ecology 15:681-694
- 481 Diegisser T, Seitz A & Johannesen J (2007) Morphological adaptation in host races of  
482 *Tephritis conura*. Entomologia Experimentalis Et Applicata 122:155-164
- 483 Dres M & Mallet J (2002) Host races in plant-feeding insects and their importance in  
484 sympatric speciation. Philosophical Transactions of the Royal Society B-Biological  
485 Sciences 357:471-492

- 486 Farrell BD (1998) "Inordinate fondness" explained: Why are there so many beetles? *Science*  
487 281:555-559
- 488 Feder JL, Chilcote CA & Bush GL (1988) Genetic differentiation between sympatric host  
489 races of the apple maggot fly *Rhagoletis pomonella*. *Nature* 336:61-64
- 490 Filchak KE, Roethele JB & Feder JL (2000) Natural selection and sympatric divergence in the  
491 apple maggot *Rhagoletis pomonella*. *Nature* 407:739-742
- 492 Gavrilets S 2004 *Fitness landscapes and the origin of species*. Princeton University Press,  
493 Princeton, N.J.
- 494 Hammer Ø, Harper DAT & P. D. R (2001) PAST: Paleontological statistics software package  
495 for education and data analysis. *Palaeontologica Electronica* 4:9
- 496 Hinojosa JC, Koubinova D, Dinca V, Hernandez-Roldan J, Munguira ML, Garcia-Barros E,  
497 Vila M, Alvarez N, Mutanen M & Vila R (2020) Rapid colour shift by reproductive  
498 character displacement in *Cupido* butterflies. *Molecular Ecology* 29:4942-4955
- 499 Jackson DA (1993) Stopping rules in principal components-analysis - A comparison of  
500 heuristic and statistical approaches. *Ecology* 74:2204-2214
- 501 Jourdan J, Krause ST, Lazar VM, Zimmer C, Sommer-Trembo C, Arias-Rodriguez L, Klaus  
502 S, Riesch R & Plath M (2016) Shared and unique patterns of phenotypic  
503 diversification along a stream gradient in two congeneric species. *Scientific Reports*  
504 6:38971
- 505 Kyogoku D & Wheatcroft D (2020) Heterospecific mating interactions as an interface  
506 between ecology and evolution. *Journal of Evolutionary Biology* 33:1330-1344
- 507 Lackey ACR & Boughman JW (2017) Evolution of reproductive isolation in stickleback fish.  
508 *Evolution* 71:357-372
- 509 Langerhans RB (2018) Predictability and parallelism of multitrait adaptation. *Journal of*  
510 *Heredity* 109:59-70

- 511 Langerhans RB & DeWitt TJ (2004) Shared and unique features of evolutionary  
512 diversification. *American Naturalist* 164:335-349
- 513 Linn CE, Darnbroski HR, Feder JL, Berlocher SH, Nojima S & Roelofs WL (2004)  
514 Postzygotic isolating factor in sympatric speciation in *Rhagoletis* flies: Reduced  
515 response of hybrids to parental host-fruit odors. *Proceedings of the National Academy*  
516 *of Sciences of the United States of America* 101:17753-17758
- 517 Loo WT, Garcia-Loor J, Dudaniec RY, Kleindorfer S & Cavanaugh CM (2019) Host  
518 phylogeny, diet, and habitat differentiate the gut microbiomes of Darwin's finches on  
519 Santa Cruz Island. *Scientific Reports* 9:18781
- 520 Martin BT, Douglas MR, Chafin TK, Jr JSP, Birkhead RD, Phillips CA & Douglas ME  
521 (2020) Contrasting signatures of introgression in North American box turtle  
522 (*Terrapene* spp.) contact zones. *Molecular Ecology* 29:4186-4202
- 523 Matlab (2017) 9.3.0.713579 (R2017b).
- 524 Matsubayashi KW, Ohshima I & Nosil P (2010) Ecological speciation in phytophagous  
525 insects. *Entomologia Experimentalis Et Applicata* 134:1-27
- 526 Mendelson TC, Martin MD & Flaxman SM (2014) Mutation-order divergence by sexual  
527 selection: Diversification of sexual signals in similar environments as a first step in  
528 speciation. *Ecology Letters* 17:1053-1066
- 529 Meyers PJ, Doellman MM, Ragland GJ, Hood GR, Egan SP, Powell THQ, Nosil P & Feder  
530 JL (2020) Can the genomics of ecological speciation be predicted across the  
531 divergence continuum from host races to species? A case study in *Rhagoletis*.  
532 *Philosophical Transactions of the Royal Society of London B-Biological Sciences*  
533 375:20190534
- 534 Mitter C, Farrell B & Wiegmann B (1988) The phylogenetic study of adaptive zones - Has  
535 phytophagy promoted insect diversification? *American Naturalist* 132:107-128

- 536 Nilsson PA, Hulthen K, Chapman B, Hansson LA, Brodersen J, Baktoft H, Vinterstare J,  
537 Bronmark C & Skov C (2017) Species integrity enhanced by a predation cost to  
538 hybrids in the wild. *Biology Letters* 13:20170208
- 539 Nosil P 2012 *Ecological speciation*. Oxford University Press, Oxford
- 540 Nosil P, Crespi BJ & Sandoval CP (2002) Host-plant adaptation drives the parallel evolution  
541 of reproductive isolation. *Nature* 417:440-443
- 542 Nylin S, Slove J & Janz N (2014) Host plant utilization, host range oscillations and  
543 diversification in nymphalid butterflies: A phylogenetic investigation. *Evolution*  
544 68:105-124
- 545 Ortega J (*in prep*) Genomic landscape of *Tephritis conura*
- 546 Pieterse W, Benitez HA & Addison P (2017) The use of geometric morphometric analysis to  
547 illustrate the shape change induced by different fruit hosts on the wing shape of  
548 *Bactrocera dorsalis* and *Ceratitis capitata* (Diptera: Tephritidae). *Zoologischer*  
549 *Anzeiger* 269:110-116
- 550 Porter CK & Benkman CW (2019) Character displacement of a learned behaviour and its  
551 implications for ecological speciation. *Proceedings of the Royal Society B-Biological*  
552 *Sciences* 286:20190761
- 553 R Core Team (2019) R: A language and environment for statistical computing.
- 554 Rohlf JF (2017) tpsDig2: Digitize coordinates of landmarks and capture outlines.
- 555 Rohlf JF (2018) tpsUtil: Utility program useful when working with tps files.
- 556 Romstock-Volkl M (1997) Host race formation in *Tephritis conura*: Determinants from three  
557 trophic levels. *Ecological Studies* 130:21-38
- 558 Roriz AKP, Japyassu HF, Caceres C, Vera MT & Joachim-Bravo IS (2019) Pheromone  
559 emission patterns and courtship sequences across distinct populations within



- 560 *Anastrepha fraterculus* (Diptera-Tephritidae) cryptic species complex. Bulletin of  
561 Entomological Research 109:408-417
- 562 Rundle HD & Nosil P (2005) Ecological speciation. Ecology Letters 8:336-352
- 563 Rundle HD & Rowe L (2018) The contribution of sexual selection to ecological and  
564 mutation-order speciation. Evolution 72:2571-2575
- 565 Schluter D (1993) Adaptive radiation in sticklebacks - Size, shape and habitat use efficiency.  
566 Ecology 74:699-709
- 567 Schluter D 2008 The ecology of adaptive radiation. Oxford Univ. Press, Oxford
- 568 Schluter D (2009) Evidence for ecological speciation and its alternative. Science 323:737-741
- 569 Servedio MR & Noor MAF (2003) The role of reinforcement in speciation: Theory and data.  
570 Annual Review of Ecology Evolution and Systematics 34:339-364
- 571 Shelomi M (2012) Where are we now? Bergmann's rule sensu lato in insects. American  
572 Naturalist 180:511-519
- 573 Sivinski J (2000) Breeding habits and sex in families closely related to the *Tephritidae*:  
574 Opportunities for comparative studies of the evolution of fruit fly behavior. In: Aluja  
575 M & Norrbom AL (eds) Fruit Flies (*Tephritidae*). Boca Raton, pp23-37
- 576 Sivinski J & Pereira R (2005) Do wing markings in fruit flies (*Diptera: Tephritidae*) have  
577 sexual significance? Florida Entomologist 88:321-324
- 578 Taylor EB, Boughman JW, Groenenboom M, Sniatynski M, Schluter D & Gow JL (2006)  
579 Speciation in reverse: morphological and genetic evidence of the collapse of a three-  
580 spined stickleback (*Gasterosteus aculeatus*) species pair. Molecular Ecology 15:343-  
581 355
- 582 Teets NM, Dias VS, Pierce BK, Schetelig MF, Handler AM & Hahn DA (2019)  
583 Overexpression of an antioxidant enzyme improves male mating performance after

584 stress in a lek-mating fruit fly. *Proceedings of the Royal Society B-Biological*  
585 *Sciences* 286:20190531

586 Thibert-Plante X & Gavrilets S (2013) Evolution of mate choice and the so-called magic traits  
587 in ecological speciation. *Ecology Letters* 16:1004-1013

588 Weiner J 1994 *The beak of the finch: A story of evolution in our time*. Jonathan Cape,  
589 London

590 Wiens JJ, Lapoint RT & Whiteman NK (2015) Herbivory increases diversification across  
591 insect clades. *Nature Communications* 6:8370

592 Zelditch ML 2004 *Geometric morphometrics for biologists*. Academic Press, Amsterdam  
593

594

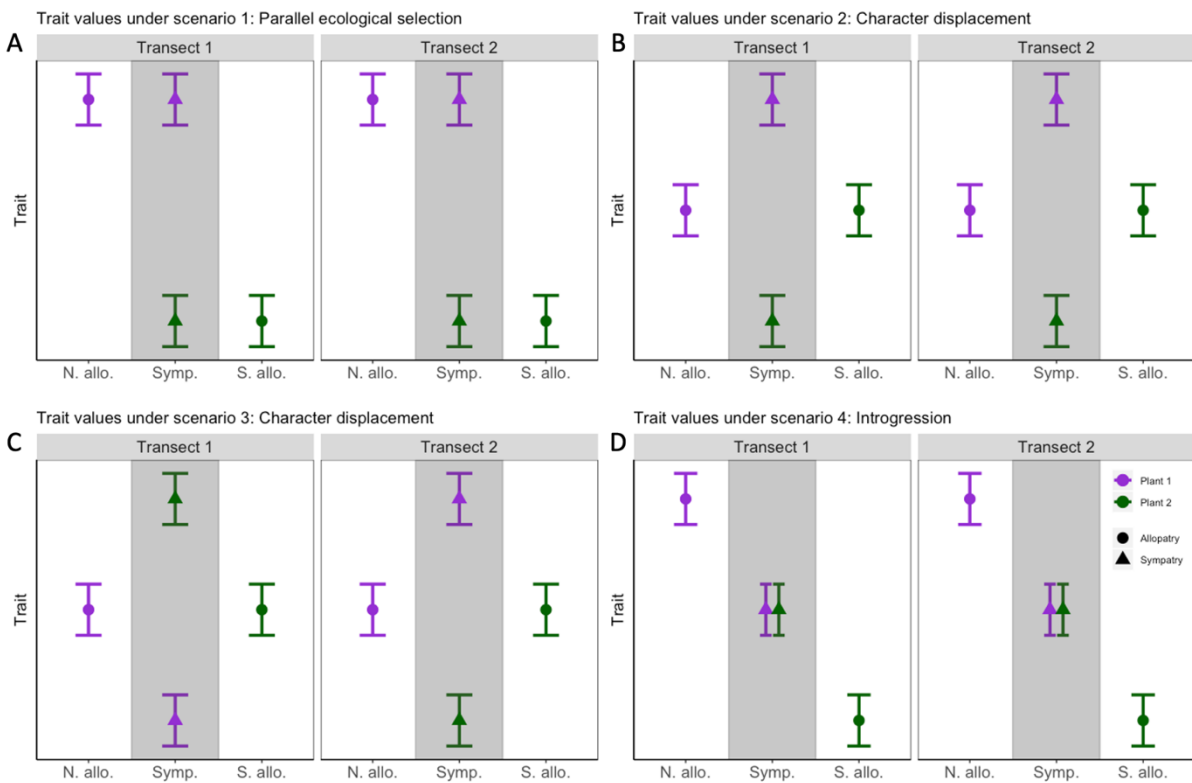

595

596 **Figure 1 Predictions for morphological divergence under different scenarios.** Four  
597 possible scenarios for population differentiation depending on the ecological and/or sexual  
598 selection pressures at play. Bars represent mean values of morphological traits, with one  
599 population being represented by each bar. While the white areas of the graph depict allopatric  
600 populations, the grey area includes co-existing populations. ‘N. allo.’ stands for northern  
601 allopatry, ‘Symp.’ stands for sympatry and ‘S. allo.’ stands for southern allopatry. Two  
602 hypothetical transects are depicted side by side. **A:** Scenario 1, parallel ecological selection  
603 between host races. This scenario would be expected for ecologically important traits where  
604 natural selection imposed by the environment provided by the host differ. **B:** Scenario 2,  
605 character displacement in a shared direction across transects. Should a sexual character be  
606 reinforced by maladaptive hybridization consistently across transects, this scenario where  
607 traits involved in mate recognition diverge further in sympatry due to character displacement  
608 would be expected. **C:** Scenario 3, character displacement in different directions across

609 transects. This would be expected in a sexual character which is reinforced by maladaptive  
610 hybridization, similarly to Scenario 2, however in this scenario the direction of adaptation is  
611 arbitrary, which would be expected under a mutation order regime. **D:** Scenario 4,  
612 hybridization in sympatric areas is causing introgression resulting in reduced divergence in  
613 these areas.

614

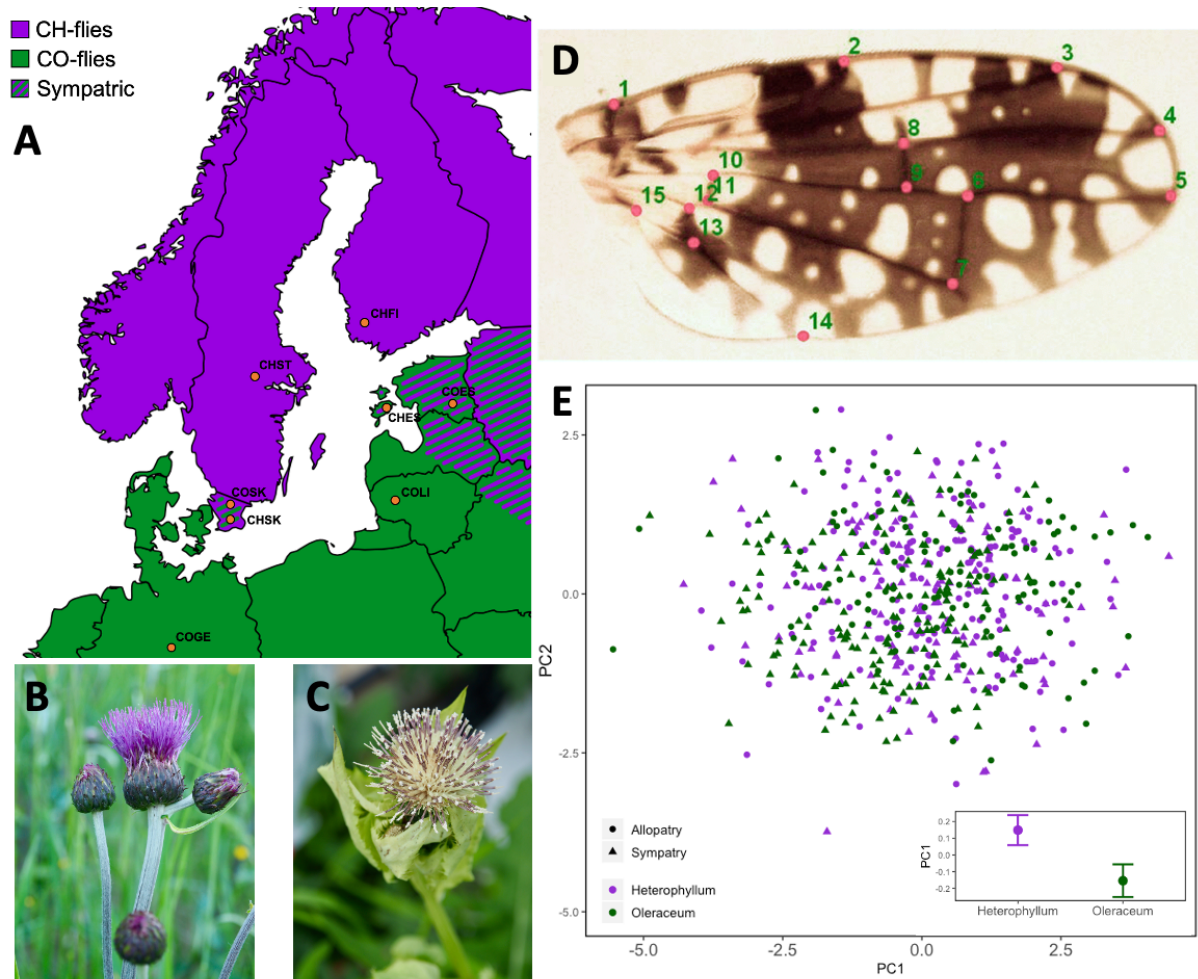

615

616 Figure 2: **Methods.** A: Map showing distribution of the *T. conura* host races, with the

617 distribution of CH-flies infesting *Cirsium heterophyllum* depicted in purple and that of CO-

618 flies infesting *Cirsium oleraceum* depicted in green. Sampling locations are indicated by red

619 circles. B: *Cirsium heterophyllum*. C: *Cirsium oleraceum*. D: Dorsal photograph of a *T.*

620 *conura* wing annotated with 15 landmarks used to analyze wing shape. E: Principal

621 component analysis of *T. conura* morphology based on females. The first two principal

622 components explain 37.84% of the variation. Insert shows the mean and standard error of the

623 mean of PC1 in the two host races.

624

625 Table 1: **MANOVA**. Addressing the effect of fly host race, co-existence, transect and the  
 626 interaction of these factors on multivariate morphological divergence in five morphological  
 627 and six wing shape traits for females and four morphological traits and six wing shapes for  
 628 males.

| MANOVA                                 | df  | Pillai | Approx. F | num df | den df | P       |     |
|----------------------------------------|-----|--------|-----------|--------|--------|---------|-----|
| <b>Females</b>                         |     |        |           |        |        |         |     |
| Host plant                             | 1   | 0.258  | 8.42      | 11     | 267    | < 0.001 | *** |
| Co-existence                           | 1   | 0.295  | 10.15     | 11     | 267    | < 0.001 | *** |
| Baltic Sea                             | 1   | 0.374  | 14.52     | 11     | 267    | < 0.001 | *** |
| Host plant x Co-existence              | 1   | 0.218  | 6.79      | 11     | 267    | < 0.001 | *** |
| Host plant x Baltic Sea                | 1   | 0.18   | 5.31      | 11     | 267    | < 0.001 | *** |
| Co-existence x Baltic Sea              | 1   | 0.163  | 4.74      | 11     | 267    | < 0.001 | *** |
| Host plant x Co-existence x Baltic Sea | 1   | 0.117  | 3.22      | 11     | 267    | < 0.001 | *** |
| Residuals                              | 277 |        |           |        |        |         |     |
| <b>Males</b>                           |     |        |           |        |        |         |     |
| Host plant                             | 1   | 0.078  | 2.29      | 10     | 271    | 0.014   | *   |
| Co-existence                           | 1   | 0.194  | 6.54      | 10     | 271    | < 0.001 | *** |
| Baltic Sea                             | 1   | 0.393  | 17.51     | 10     | 271    | < 0.001 | *** |
| Host plant x Co-existence              | 1   | 0.179  | 5.92      | 10     | 271    | < 0.001 | *** |
| Host plant x Baltic Sea                | 1   | 0.16   | 5.12      | 10     | 271    | < 0.001 | *** |
| Co-existence x Baltic Sea              | 1   | 0.131  | 4.1       | 10     | 271    | < 0.001 | *** |
| Host plant x Co-existence x Baltic Sea | 1   | 0.092  | 2.74      | 10     | 271    | 0.003   | **  |
| Residuals                              | 280 |        |           |        |        |         |     |

629

630

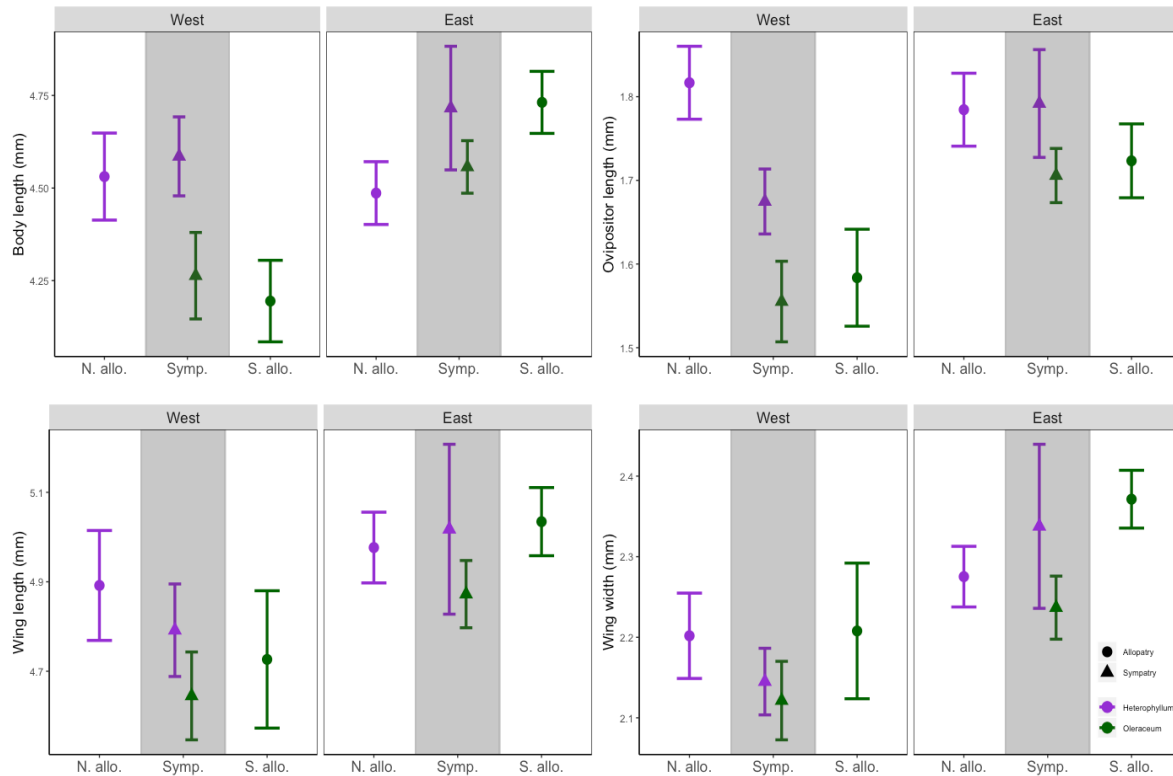

631

632 **Figure 3: Trait measurements of female *T. conura* divided by host race, co-existence and**

633 **geographic setting.** Host race is illustrated by color, with purple corresponding to CH-flies

634 infesting purple melancholy thistle and green to CO-flies infesting white cabbage thistle. The

635 grey shaded area in the center contains the sympatric populations (denoted by triangles). X

636 axis labels represent which state of co-existence the fly population is in. ‘N.allo.’ stands for

637 Northern allopatric, ‘Symp.’ stands for sympatric and ‘S. allo.’ stands for Southern allopatric.

638 West and East headers represent from which side of the Baltic Sea the populations are

639 sampled. **A:** Mean values of female *T. conura* body length per population. **B:** Mean values of

640 female *T. conura* ovipositor length per population. **C:** Mean values of female *T. conura* wing

641 length per population. **D:** Mean values of female *T. conura* wing width per population. All

642 plots portray mean trait values with 95% confidence interval bars of the mean.

643

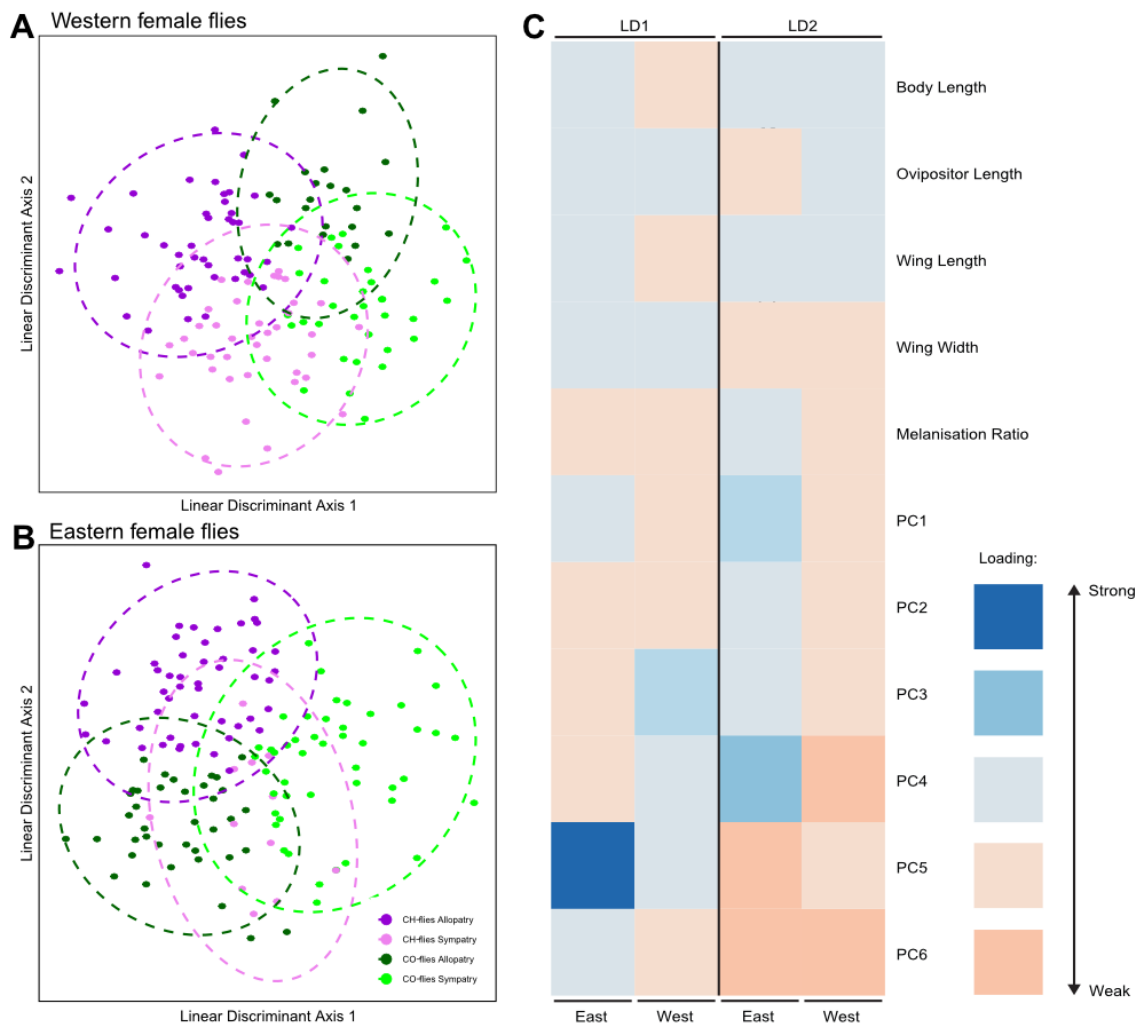

644

645 **Figure 4: Linear discriminant function analyses and bootstrapped loadings. A and B:**

646 LDAs illustrating differences in how the host races group along the first two linear

647 discriminant axes in Western (A) and Eastern (B) flies. C: The morphological traits loading

648 on the two first discriminant axes for Eastern and Western flies. Colors illustrate how much

649 the standard error diverges from zero based on 100 000 bootstrap replications. Loading that

650 surpass zero are depicted in red colors whereas loadings significantly lower than zero are

651 colored in blue. Plots and analyses are based on female fly morphology.
